# Supplementary material for: Global gridded crop model evaluation: benchmarking, skills, deficiencies and implications
Source: Copernicus journal article supplement (doi:10.5194/gmd-10-1403-2017), 2017-04-04
Supplement: Supplementary file [file gmd-10-1403-2017-supplement.pdf]

Supplement of Geosci. Model Dev., 10, 1403–1422, 2017  
<http://www.geosci-model-dev.net/10/1403/2017/>  
doi:10.5194/gmd-10-1403-2017-supplement  
© Author(s) 2017. CC Attribution 3.0 License.

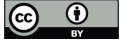

*Supplement of*

## **Global gridded crop model evaluation: benchmarking, skills, deficiencies and implications**

**Christoph Müller et al.**

*Correspondence to:* Christoph Müller ([christoph.mueller@pik-potsdam.de](mailto:christoph.mueller@pik-potsdam.de))

The copyright of individual parts of the supplement might differ from the CC-BY 3.0 licence.

## Contents

|                                                                                                                           |    |
|---------------------------------------------------------------------------------------------------------------------------|----|
| Simulations at non-standard resolution .....                                                                              | 3  |
| Different temporal resolution.....                                                                                        | 3  |
| Different spatial resolution.....                                                                                         | 3  |
| Tables .....                                                                                                              | 4  |
| Table S 1: Main characteristics of GGCMs.....                                                                             | 4  |
| Table S 2: Model inputs and agricultural management practices .....                                                       | 5  |
| Table S 3: Biophysical process representation in GGCMs .....                                                              | 7  |
| Table S 4: Model calibration, parameters, scale and methods .....                                                         | 9  |
| Figures.....                                                                                                              | 11 |
| Figure S 1: As figure 1 in the main text, but for the maize <i>fullharm</i> setting. ....                                 | 11 |
| Figure S 2: As figure 1 in the main text, but for the maize <i>harm-suffN</i> setting.....                                | 12 |
| Figure S 3: As figure 2 in the main text, but for the wheat <i>fullharm</i> setting.....                                  | 13 |
| Figure S 4: As figure 2 in the main text, but for the wheat <i>harm-suffN</i> setting. ....                               | 14 |
| Figure S 5: As figure 3 in the main text, but for the rice <i>fullharm</i> setting.....                                   | 15 |
| Figure S 6: As figure 3 in the main text, but for the rice <i>harm-suffN</i> setting. ....                                | 16 |
| Figure S 7: As figure 4 in the main text, but for the soybean <i>fullharm</i> setting.....                                | 17 |
| Figure S 8: As figure 4 in the main text, but for the soybean <i>harm-suffN</i> setting. ....                             | 18 |
| Figure S 9: As figure 5 in the main text, but for wheat. ....                                                             | 19 |
| Figure S 10: As figure 5 in main text, but for rice.....                                                                  | 20 |
| Figure S 11: As figure 5 in main text, but for soybean. ....                                                              | 21 |
| Figure S 12: As figure 6 in main text, but without allowing for time shifts of one year in the correlation analysis. .... | 22 |
| Figure S 13: As figure 6 in main text, but for all maize producer countries simulated here. ....                          | 23 |
| Figure S 14: As figure 6 in main text, but for wheat.....                                                                 | 24 |
| Figure S 15: As Figure S12, but for wheat.....                                                                            | 24 |
| Figure S 16: As figure 13, but for wheat.....                                                                             | 25 |
| Figure S 17: As figure 6 in main text, but for rice.....                                                                  | 26 |
| Figure S 18: As Figure S12, but for rice.....                                                                             | 26 |
| Figure S 19: As Figure S13, but for rice.....                                                                             | 28 |

|                                                                                                 |    |
|-------------------------------------------------------------------------------------------------|----|
| Figure S 20: As figure 6 in main text, but for soybean. ....                                    | 28 |
| Figure S 21: As Figure S12, but for soybean. ....                                               | 28 |
| Figure S 22: As Figure S13, but for soybean. ....                                               | 29 |
| Figure S 23: As figure 7 in main text, but for all maize producing countries included here..... | 30 |
| Figure S 24: As Figure S23, but for wheat.....                                                  | 31 |
| Figure S 25: As Figure S23 but for rice.....                                                    | 32 |
| Figure S 26: As Figure S23 but for soybean. ....                                                | 33 |
| Figure S 27: As figure 8 in main text, but with flattened time dimension.....                   | 34 |
| Figure S 28: As figure 8 in main text, but after removing national means.....                   | 35 |
| Figure S 29: As figure 8 in main text, but for wheat.....                                       | 36 |
| Figure S 30: As Figure S27, but for wheat.....                                                  | 37 |
| Figure S 31: As Figure S28, but for wheat.....                                                  | 38 |
| Figure S 32: As figure 8 in main text, but for rice.....                                        | 39 |
| Figure S 33: As Figure S27, but for rice.....                                                   | 40 |
| Figure S 34: As Figure S28, but for rice.....                                                   | 41 |
| Figure S 35: As figure 8 in main text, but for soybean. ....                                    | 42 |
| Figure S 36: As Figure S27, but for soybean. ....                                               | 43 |
| Figure S 37: As Figure S28, but for soybean. ....                                               | 44 |
| Figure S 38: As figure 10 in main text, but for wheat.....                                      | 45 |
| Figure S 39: As figure 10 in main text, but for rice.....                                       | 46 |
| Figure S 40: as figure 10 in main text, but for soybean.....                                    | 47 |
| Figure S 41: as figure 10 in main text, but for pDDSAT only.....                                | 48 |
| Figure S 42: Best performing ( $R^2$ ) GGCM per grid cell for maize ( <i>default</i> ). ....    | 49 |
| Figure S 43: as figure 11 in main text, but for wheat. ....                                     | 50 |
| Figure S 44: as figure 11 in main text but for rice. ....                                       | 51 |
| Figure S 45: as figure 11 in main text, but for soybean.....                                    | 52 |
| References.....                                                                                 | 53 |

## Simulations at non-standard resolution

Some models performed simulations at different spatial or temporal resolution than supplied in the input data sets (Table S2).

### Different temporal resolution

ORCHIDEE-crop used an internal weather generator for the interpolation to sub-daily values, whereas CLM-crop created a 6-hourly weather input data set based on AgMERRA and the 6-hourly CRU NCEP data (Wei et al., 2014). For the Temperate and Precip fields the CLM-crop group took the daily AgMERRA data and then compared it to the CRU NCEP daily average values to create a daily delta which was then added to each 6hr CRU NCEP field to generate the new hybrid data set.

For Precip this worked as:

$$dtPrecip = (AgMERRADailyPrecip - Sum(CRU NCEP 6hr Precip (1..4))) / 4$$

$$AgMERRA6hrPrecip = max(CRUN NCEP 6hr Precip + dtPrecip, 0.0)$$

For Temp this worked as

$$dtTemp = AgMERRADailyTemp - Avg(CRU NCEP 6hr Temp(1..4))$$

$$AgMERRA6hrTemp = CRU NCEP 6hr Temp + dtTemp$$

The CLM-crop group used the CRU NCEP solar and wind for the AgMIP simulations.

### Different spatial resolution

CLM-crop used the model-internal re-gridding routine as described in the CLM 4.5 Technical Note (Oleson et al., 2013), PRYSBI2 simply averaged over all 0.5 grid cells within the 1.125 degree cells and EPIC-BOKU and EPIC-IIASA used the same climate and management input for all 5 arc minute cells (up to 36) within one single 0.5 degree grid cell.



## Tables

**Table S 1: Main characteristics of GGCMs.**

| Model         | Type <sup>1</sup> | CO2 effects <sup>2</sup>                           | Stresses <sup>3</sup>    | Calibration <sup>5</sup>  | Calibrated parameters             | Outputs                            |
|---------------|-------------------|----------------------------------------------------|--------------------------|---------------------------|-----------------------------------|------------------------------------|
| CGMS-WOFOST   | Site-based        | LF, TE                                             | W, T                     | Site-specific             | Tsum requirements                 | Actual/potential yield and biomass |
| CLM-crop      | Ecosystem         | LF, TE                                             | W,N,H                    | Uncalibrated              | NA                                | Actual yield                       |
| EPIC-BOKU     | Site-based        | RUE, TE                                            | W, T, H, A, N, P, BD, AL | Site-specific (EPIC 0810) | NA                                | Actual yield & yield gap           |
| EPIC-IIASA    | Site-based        | RUE, TE                                            | W, T, H, A, N, P, BD, AL | Site-specific and global  | F, HIpot (ric, mai)<br>F (others) | Actual yield                       |
| EPIC-TAMU     | Site-based        | RUE, TE                                            | W, T, H, A, N, P, BD, AL | Site-specific and global  | HIpot (maize)                     | Actual yield                       |
| GEPIC         | Site-based        | RUE, TE                                            | W, T, A, N, P, BD, AL    | Site-specific (EPIC 0810) | F HIpot (for maize and rice)      | Actual yield                       |
| LPJ-GUESS     | Ecosystem         | LF, SC                                             | W, T                     | Uncalibrated              | NA                                | Actual yield                       |
| LPJmL         | Ecosystem         | LF, SC                                             | W, T                     | National                  | LAI <sub>max</sub> HI $\alpha$    | Actual yield                       |
| ORCHIDEE-crop | Ecosystem         | LF, SC                                             | W,T,N                    | Uncalibrated              | -                                 | Actual yield                       |
| pAPSIM        | Site-based        | RUE                                                | W, T, H, A, N            | Site-specific (APSIM)     | NA                                | Actual yield                       |
| pDSSAT        | Site-based        | RUE (for wheat, rice, maize) and LF (for soybeans) | W, T, H, A, N            | Site-specific (DSSAT)     | NA                                | Actual yield                       |
| PEGASUS       | Ecosystem         | RUE, TE                                            | W, T, H, N, P, K         | Global                    | $\beta$                           | Actual yield                       |
| PEPIC         | Site-based        | RUE, TE                                            | W, T, H, A, N, P, BD, AL | Site-specific and global  | F HIpot (for maize)               | Actual yield                       |
| PRYSBI2       | Ecosystem         | LF, SC                                             | W,T                      | Global yield              | TH, TC, TS, LR                    | Actual yield                       |

Notes: (NA where not applicable)

<sup>1</sup> Site-based: site-base crop model; Ecosystem: global ecosystem model

<sup>2</sup> Elevated CO<sub>2</sub> effects: LF: Leaf-level photosynthesis (via rubisco or quantum-efficiency and leaf-photosynthesis saturation); RUE: Radiation use efficiency; TE: Transpiration efficiency; SC: stomatal conductance

<sup>3</sup> W: water stress; T: temperature stress; H: specific-heat stress; A: oxygen stress; N: nitrogen stress; P: phosphorus stress; K: potassium stress; BD: bulk density; AL: aluminum stress (based on pH and base saturation)

<sup>4</sup> Fertilizer application, timing of application; NPK annual application of total NPK (nutrient-stress factor); source of fertilizer application data; timing: annual or dynamic

<sup>5</sup> F: fertilizer application rate; HIpot: Potential harvest index; LAI<sub>max</sub>: maximum LAI under unstressed conditions; HI: harvest index;  $\alpha$ : factor for scaling leaf-level photosynthesis to stand level;  $\beta$ : radiation-use efficiency factor; TH: Total Heat unit required for the maturity; TC: Technological coefficient; TS: Temperature sensitivity of photosynthesis; LR: ratio of leaf to above ground biomass.

**Table S 2: Model inputs and agricultural management practices**

| Model                     | Spatial scale                                                       | Temporal scale <sup>1</sup> | Climate input variables <sup>2</sup> | Soil input data <sup>3</sup>                                                      | Spin-up <sup>4</sup>                           | Planting date decision <sup>5</sup>                           | Crop cultivars <sup>6</sup>                                                    | Irrigation rules <sup>7,8</sup>                                    | Fertilizer application <sup>9</sup>                                                                                  | Crop residue <sup>10</sup>       |
|---------------------------|---------------------------------------------------------------------|-----------------------------|--------------------------------------|-----------------------------------------------------------------------------------|------------------------------------------------|---------------------------------------------------------------|--------------------------------------------------------------------------------|--------------------------------------------------------------------|----------------------------------------------------------------------------------------------------------------------|----------------------------------|
| <b>CGMS-WOFOST</b>        | 0.5° lon x 0.5° lat                                                 | D                           | Ta Tmn Tmx P<br>Rad Vap WS           | FAO 1:5M DSMW AWC<br>HYD                                                          | H2O (1)                                        | Fixed planting day                                            | GDD fixed                                                                      | NA                                                                 | NA                                                                                                                   | NA                               |
| <b>CLM-crop</b>           | 1° lon x 1° lat                                                     | 6-hourly                    | T,P,WS,Q,SW,<br>Rad                  | IGBP Global Soil Data Task<br>2000                                                | NA                                             | S                                                             | GDD+V                                                                          | MIRCA 2000<br>(Portmann et al.,<br>2010)                           | N                                                                                                                    | To litter pool                   |
| <b>EPIC-BOKU</b>          | 5" lon x 5"lat<br>(default); 0.5° lon x<br>0.5° lat<br>(harmonized) | D                           | Tmn, Tmx, P,<br>Rad, RH, WS          | ISRIC-WISE,<br>ROSETTA,AWC, ALBEDO<br>(Dobos, 2006), HYD<br>(USDA and NRCS, 2015) | Soil OM, C,<br>NH3, NO3,<br>H2O, P(1)          | S (fraction of<br>PHU), fixed<br>planting window              | GDD - fixed                                                                    | 90/100/500/50/208<br>maximum applied<br>irrigation: 500 mm<br>yr-1 | automatic N input (max<br>200 kg Ha-1 yr-1) PK<br>(national stat. IFA)<br>dynamic application                        | No, can be<br>simulated          |
| <b>EPIC-IIASA</b>         | 5" lon x 5"lat<br>(default); 0.5° lon x<br>0.5° lat<br>(harmonized) | D                           | Tmn, Tmx, P,<br>Rad, RH, WS          | ISRIC-WISE; ROSETTA;<br>AWC; HYD (USDA and<br>NRCS, 2015)                         | Soil OM, C,<br>NH3, NO3,<br>H2O, P, CR<br>(50) | F (fixed planting<br>window)                                  | GDD, 3 cult for<br>mai, 2 cult for<br>wheat fixed                              | 90/100/2000/500/0                                                  | NP (sub-national stat by<br>(Mueller et al., 2012) P<br>timing: rigid; N timing:<br>automatic (based on N<br>stress) | No                               |
| <b>EPIC-TAMU</b>          | 0.5° lon x 0.5° lat                                                 | D                           | Tmn, Tmx, P,<br>Rad, RH, WS          | ISRIC-WISE                                                                        | Soil OM, C,<br>NH3, NO3,<br>H2O, P, CR<br>(10) | S, planting<br>delayed until 2<br>deg above base<br>temp      | GDD, 2<br>cultivars for<br>mai                                                 | 99/100/9999/100/25                                                 | NPK at planting                                                                                                      | No                               |
| <b>GEPIEC</b>             | 0.5° lon x 0.5° lat                                                 | D                           | Tmn, Tmx, P,<br>Rad, RH, WS          | ISRIC-WISE                                                                        | Soil OM, C,<br>NH3, NO3,<br>H2O, P, CR<br>(20) | F (fixed planting<br>window)                                  | GDD, 2<br>cultivars for<br>mai - fixed                                         | 90/100/2000/<br>1000/0.018                                         | NP (national stat.<br>FertiSTAT), dynamic<br>application of N, rigid<br>application of P                             | Yes, Crop-<br>specific           |
| <b>LPJ-GUESS</b>          | 0.5° lon x 0.5° lat                                                 | D                           | Ta, P, cld (or<br>Rad)               | HWSD, STC HYD (Cosby et<br>al., 1984), THM (Lawrence<br>and Slater, 2008)         | H2O (30)                                       | S (Waha et al.,<br>2012), fixed<br>planting window            | GDD+V (whe,<br>sunfl, rapese);<br>BT (mai); static<br>(others) + clim.<br>adap | 200/90/100/100 <sup>7</sup>                                        | NA                                                                                                                   | Yes, does<br>not affect<br>yield |
| <b>LPJmL</b>              | 0.5° lon x 0.5° lat                                                 | D                           | Ta, P, cld (or<br>Rad)               | HWSD, STC HYD (Cosby et<br>al., 1984), THM (Lawrence<br>and Slater, 2008)         | H2O, Tsoil<br>(200)                            | S (Waha et al.,<br>2012), fixed<br>planting day after<br>1951 | GDD+V (whe,<br>sunfl, rapese);<br>BT (mai); static<br>(others) - fixed         | 300/90/100/varies <sup>7</sup>                                     | NA                                                                                                                   | Yes, does<br>not affect<br>yield |
| <b>ORCHIDEE-<br/>crop</b> | 0.5° lon x 0.5° lat                                                 | Half-<br>hourly             | Tmn, Tmax, P,<br>Rad, RH, WS         | NA                                                                                | H2O (1)                                        | F (Sacks et al.,<br>2010)                                     | Fixed                                                                          | 200/90/100/varies <sup>7</sup>                                     | N(IFA)                                                                                                               | Yes, does<br>not affect<br>yield |
| <b>pAPSIM</b>             | 0.5° lon x 0.5° lat                                                 | D                           | Tmn, Tmx,P,<br>Rad                   | HSWD                                                                              | NA                                             | F (S is also<br>possible)                                     | GDD and/or<br>latitude, 2-3 for<br>each cell                                   | NA                                                                 | GGCMI                                                                                                                | NA                               |

|                |                         |   |                               |                               |                                       |                                              |                                                |                                               |                                                                         |                            |
|----------------|-------------------------|---|-------------------------------|-------------------------------|---------------------------------------|----------------------------------------------|------------------------------------------------|-----------------------------------------------|-------------------------------------------------------------------------|----------------------------|
| <b>pDSSAT</b>  | 0.5° lon x 0.5° lat     | D | Tmn, Tmx, P, Rad              | HWSD                          | Soil OM, C, NH3, NO3, H2O (1)         | S (Sacks et al., 2010) fixed planting window | GDD and/or latitude, 2-3 for each cell - fixed | 40/80/100/757 ric: 30/50/100/100 <sup>7</sup> | GGCMI                                                                   | Yes, does not affect yield |
| <b>PEGASUS</b> | 0.5° lon x 0.5° lat     | D | Ta, Tmn, Tmx, P, cld (or sun) | AWC (ISRIC-WISE)              | H2O (4)                               | S (Deryng et al., 2011) clim. adapt          | GDD + clim. adapt                              | 40/90/100/100 <sup>7</sup>                    | NPK (national stat. IFA), annual application                            | NA                         |
| <b>PEPIC</b>   | 0.5° lon x 0.5° lat     | D | Tmn, Tmx, P, Rad, RH, WS      | ISRIC-WISE                    | Soil OM, C, NH3, NO3, H2O, P, CR (20) | Fixed planting day                           | GDD, 2 cultivars for mai                       | 90/100/1000/500/1                             | NP (national stat. FertiSTAT), three times of N, rigid application of P | Yes                        |
| <b>PRYSBI2</b> | 1.125° lon x 1.125° lat | D | Tmn, Tmx, P, Rad, RH, WS      | ISLSCP-II (Hall et al., 2006) | NA                                    | F (Sacks et al., 2010)                       | GDD - fixed                                    | NA                                            | NA                                                                      | No                         |

Notes: (NA where not applicable)

<sup>1</sup> D: daily time-step; M: monthly time-step; H: hourly time-step; WG: use monthly climate data interpolated to daily using a weather-generator

<sup>2</sup> Ta: average temperature, Tmn: minimum temperature, Tmx: maximum temperature, cld: percentage of cloud cover, sun: fraction of sunshine hours; RH: relative humidity; WS: wind speed; Vap: vapour pressure, Rad: radiation

<sup>3</sup> Source of soil property inputs (e.g., source of basic soil properties), plus method for manipulation to derive parameters required by the model); AWC: Available Water Capacity (Van Genuchten et al., 1992) ; HYD: hydraulic soil parameters; THM: thermal parameters; HWSD: Harmonized world soil database (Fischer et al., 2008); STC: soil texture classification based on the USDA soil texture classification (<http://ufdc.ufl.edu/IR00003107/00001>); ISRIC-WISE (Batjes, 2006) ; ROSETTA (Schaap and Bouten, 1996)

<sup>4</sup> Number of years for Spin up (x); OM: organic matter, C: carbon; NH3: ammonia; NO3: nitrate; H2O: soil water; P: phosphorus; CR: crop residues

<sup>5</sup> S: Simulate planting dates according to climatic conditions; F: fixed planting dates; source of planting date data if applicable; PHU: potential heat unit; fixed planting window (i.e., does not allow for adaptation to climate change); clim. adapt: dynamic planting window (adaptation to climate change)

<sup>6</sup> GDD: Simulate crop Growing Degree Days (GDDs) requirement according to estimated annual GDDs from daily temperature; Number of cultivars; GDD+V: GDD requirements and vernalization requirements computed based on past climate experience; BT base temperature computed based on past climate; fixed: static GDD requirement (no adaptation); clim. adapt: dynamic GDD requirement (adaptation to climate change)

<sup>7</sup> Irrigation rules: IMDEP: depth of soil moisture measured; ITHRL(): critical lower soil moisture threshold to trigger irrigation event; ITHRU(): upper soil moisture threshold to stop irrigation; IREFF: irrigation application efficiency

<sup>8</sup> Irrigation rules: EPIC and GEPIC models: BIR(): water stress in crop to trigger automatic irrigation; EFI(): irrigation efficiency - runoff from irrigation water; VIMX: maximum of annual irrigation volume; ARMX: maximum of single irrigation volume allowed; ARMN: minimum of single irrigation volume allowed

<sup>9</sup> Fertilizer application, timing of application; NPK annual application of total NPK (nutrient-stress factor); source of fertilizer application data; timing: annual or dynamic

<sup>10</sup> Remove residue or not (Yes/No)

**Table S 3: Biophysical process representation in GCMs**

| Model         | Leaf area development <sup>1</sup> | Light interception <sup>2</sup> | Light utilisation <sup>3</sup> | Yield formation <sup>4</sup> | Stresses involved <sup>5</sup> | Type of heat stress <sup>6</sup> | Crop phenology <sup>7</sup> | Type of water stress <sup>8</sup> | Evapo-transpiration <sup>9</sup> | Soil water dynamic <sup>10</sup> | Root distribution over depth <sup>11</sup> | Soil CN model <sup>12</sup> | CO2 effects <sup>13</sup> |
|---------------|------------------------------------|---------------------------------|--------------------------------|------------------------------|--------------------------------|----------------------------------|-----------------------------|-----------------------------------|----------------------------------|----------------------------------|--------------------------------------------|-----------------------------|---------------------------|
| CGMS-WOFOST   | DA                                 | D                               | P-R                            | Prt                          | W T A                          | V                                | T DL V                      | S                                 | PM                               | 2                                | NON                                        | NA                          | LF TE                     |
| CLM-crop      | DA                                 | D                               | P-R                            | Prt                          | W,N,H                          | V                                | T & DL                      | S                                 | TF                               | 10                               | EXP                                        | C/N                         | LF, TE                    |
| EPIC-BOKU     | PS                                 | S                               | RUE                            | HIws<br>Prt B                | W T H<br>A N P<br>BD AL        | NA                               | T(HU)<br>V O                | E                                 | PM                               | 10                               | EXP W                                      | C N<br>B(1)<br>P(6)         | RUE<br>TE                 |
| EPIC-IIASA    | PS                                 | S                               | RUE                            | HIws<br>Prt B                | W T H<br>A N P<br>BD AL        | NA                               | T(HU)<br>V O                | E                                 | HAR                              | 10                               | EXP W                                      | C N<br>B(1)<br>P(6)         | RUE<br>TE                 |
| EPIC-TAMU     | PS                                 | S                               | RUE                            | HIws<br>Prt B                | W T H<br>A N P<br>BD AL        | NA                               | T(HU)<br>V O                | E                                 | PM                               | 3                                | EXP W                                      | C N<br>B(1)<br>P(6)         | RUE<br>TE                 |
| GEPIC         | PS                                 | S                               | RUE                            | HIws<br>Prt B                | W T A<br>N P BD<br>AL          | NA                               | T(HU)<br>V O                | E                                 | HAR                              | 5                                | EXP W                                      | C N<br>B(1)<br>P(6)         | RUE<br>TE                 |
| LPJ-GUESS     | DA                                 | S                               | P-R                            | HIws                         | W T                            | NA                               | T V                         | S                                 | PT                               | 2                                | LIN                                        | NA                          | LF, SC                    |
| LPJmL         | PS                                 | S                               | P-R                            | HIws                         | W T                            | NA                               | T V                         | S                                 | PT                               | 5                                | EXP                                        | NA                          | LF, SC                    |
| ORCHIDEE-crop | DA                                 | S                               | P-R                            | Prt                          | WT N                           | VR                               | T(HU)<br>DL O V             | S                                 | PT                               | 11                               | EXP                                        | NA                          | LF, SC                    |
| pAPSIM        | DA                                 | S                               | RUE,P-R(pasture only)          | Gn,<br>Prt,<br>HIw (soy)     | T,DI,O,<br>V                   | EXP                              | W,N,A,<br>H                 | E, S                              | TE                               | 5                                | EXP                                        | C,N,P,<br>B(3)              | RUE,<br>TE, NE            |
| pDSSAT        | PS(soy=DA)                         | S/D                             | RUE/P-R                        | Gn                           | W T H<br>A N                   | V R F                            | T V DL<br>O                 | E                                 | PT/PM                            | 4                                | EXP                                        | C N<br>P(3)                 | RUE,<br>LF, TE            |
| PEGASUS       | DA                                 | S                               | RUE                            | Prt                          | W T H<br>N P K                 | V F <sup>14</sup>                | T(HU)                       | E                                 | PT                               | 3                                | LIN W                                      | NA                          | RUE<br>TE                 |
| PEPIC         | PS                                 | S                               | RUE                            | HIws<br>Prt B                | W T H<br>A N P<br>BD AL        | NA                               | T(HU)<br>V O                | E                                 | PM                               | 5                                | EXP W                                      | C N<br>B(1)<br>P(6)         | RUE<br>TE                 |
| PRYSBI2       | DA                                 | S                               | P-R                            | HI                           | W T                            | V                                | HU                          | E                                 | PM                               | 2                                | EXP                                        | NA                          | LF, SC                    |

Notes: (NA where not applicable):

<sup>1</sup> DA: Dynamic simulation based on development and growth processes; PS: prescribed shape of LAI curve as function of phenology, modified by water stress & low productivity

<sup>2</sup> S: Simple approach; D: Detailed approach

<sup>3</sup> RUE: Simple (descriptive) radiation use efficiency approach; P-R: Detailed (explanatory) gross photosynthesis – respiration (for more details see Adam et al. (2011))

<sup>4</sup> Yield formation depending on: HI: fixed harvest – index; B: total (above – ground) biomass; Gn: number of grains and grain growth rate; Prt: partitioning during reproductive stages; HIws: HI modified by water stress

<sup>5</sup> W: water stress; T: temperature stress; H: specific-heat stress; A: oxygen stress; N: nitrogen stress; P: phosphorus stress; K: potassium stress; BD: bulk density; AL: aluminum stress (based on pH and base saturation)

<sup>6</sup> V: vegetative (source); R: reproductive organ (sink); F: number of grain (pod) set during the flowering period

<sup>7</sup> Crop phenology is a function of: T: temperature; DL: photoperiod (day length); O: other water/nutrient stress effects considered; V: vernalization; HU: Heat unit index

<sup>8</sup> E: ratio of supply to demand of water; S: soil available water in root zone

<sup>9</sup> PM: Penman – Monteith; PT: Priestley –Taylor; HAR: Hargreaves; TE: transpiration efficiency; TF: Turbulent Flux (Farquhar et al., 1980)

<sup>10</sup> (x): x number of soil layers

<sup>11</sup> LIN: linear; EXP: exponential; NON: no roots-just soil depth zone; W: actual roots depends on water availability in each soil layer

<sup>12</sup> C model; N model; P(x): x number of organic matter pools; B(x): x number of microbial biomass pools

<sup>13</sup> Elevated CO<sub>2</sub> effects: LF: Leaf-level photosynthesis (via rubisco or quantum-efficiency and leaf-photosynthesis saturation; RUE: Radiation use efficiency; TE: Transpiration efficiency; SC: Stomatal conductance

<sup>14</sup> see Deryng et al. (2014)

**Table S 4: Model calibration, parameters, scale and methods**

| Model                | Model origin <sup>1</sup> | Calibration method                                                              | Parameters for calibration <sup>2</sup> | Output variable and dataset for calibration <sup>3</sup> | Spatial scale of calibration                     | Temporal scale of calibration                                                                                           | Method for model evaluation <sup>4</sup> |
|----------------------|---------------------------|---------------------------------------------------------------------------------|-----------------------------------------|----------------------------------------------------------|--------------------------------------------------|-------------------------------------------------------------------------------------------------------------------------|------------------------------------------|
| <b>CGMS-WOFOST</b>   | Site-based                | Default parameters from site-specific analysis (WOFOST 6.0)                     | NA                                      | NA                                                       | Field scale                                      | Mostly trials from 1980-2000                                                                                            | NA                                       |
| <b>CLM-crop</b>      | Ecosystem                 | NA                                                                              | NA                                      | NA                                                       | NA                                               | NA                                                                                                                      | NA                                       |
| <b>EPIC-BOKU</b>     | Site-based                | Site-specific (EPIC 0810)                                                       | NA                                      | Yield (FE & FAO)                                         | Field scale & National                           | Various                                                                                                                 | NA                                       |
| <b>EPIC-IIASA</b>    | Site-based                | Site-specific (EPIC 0810) & Global <sup>5</sup>                                 | F, HIpot (ric, mai)F (others)           | Yield (FE & FAO)                                         | National                                         | Around 2000                                                                                                             | R2                                       |
| <b>EPIC-TAMU</b>     | Site-based                | Site-specific                                                                   | HIpot (mai)                             | Yield (SPAM 2000 by You et al. (2014))                   | Grid cell level                                  | 2000                                                                                                                    | various                                  |
| <b>GEPIC</b>         | Site-based                | Site-specific (EPIC 0810) & Global <sup>5</sup>                                 | F HIpot (mai, ric)                      | Yield (FE & FAO)                                         | National                                         | Average for 1997-2003                                                                                                   | R2                                       |
| <b>LPJ-GUESS</b>     | Ecosystem                 | Uncalibrated                                                                    | NA                                      | NA                                                       | NA                                               | NA                                                                                                                      | NA                                       |
| <b>LPJmL</b>         | Ecosystem                 | Global                                                                          | LAI <sub>max</sub> HI alpha_a           | Yield (FAO)                                              | National                                         | Average for 1998-2003                                                                                                   | Wilmott                                  |
| <b>ORCHIDEE-crop</b> | Ecosystem                 | Uncalibrated                                                                    | NA                                      | NA                                                       | NA                                               | NA                                                                                                                      | NA                                       |
| <b>pAPSIM</b>        | Site-based                | Default parameters from site-specific analyses                                  | NA                                      | NA                                                       | field scale                                      | NA                                                                                                                      | NA                                       |
| <b>pDSSAT</b>        | Site-based                | Site-specific (DSSAT)                                                           | NA                                      | Yield (FE)                                               | Field scale                                      | Various                                                                                                                 | NA                                       |
| <b>PEGASUS</b>       | Ecosystem                 | Global                                                                          | $\beta$                                 | Yield (M3 by Monfreda et al. (2008))                     | Grid cell level (0.5° lon x 0.5° lat resolution) | Average for 1997-2004                                                                                                   | Wilmott                                  |
| <b>PEPIC</b>         | Site-based                | Default parameters from site-specific analyses of EPIC0810 Potential HI (maize) | NA                                      | Yield (FAO yield statistics)                             | National                                         | Average for 1998-2002                                                                                                   | R2                                       |
| <b>PRYSBI2</b>       | Ecosystem                 | Global                                                                          | TH, TC, TS, LR                          | Yield (Iizumi et al. (2014))                             | Grid cell level                                  | 1982-2006 (but the odd-numbered years were used as learning data for the estimation for the even years, and vice versa) | Log likelihood                           |

Notes: (NA where not applicable)

<sup>1</sup> site-base crop model, ecosystem: global ecosystem model

<sup>2</sup> F: fertilizer application rate; HIpot: Potential harvest index; LAI<sub>max</sub>: maximum LAI under unstressed conditions; HI: harvest index;  $\alpha_a$ : factor for scaling leaf-level photosynthesis to stand level;  $\beta$ : radiation-use efficiency factor; TH: Total Heat unit required for the maturity; TC: Technological coefficient; TS: Temperature sensitivity of photosynthesis; LR: ratio of leaf to above ground biomass

<sup>3</sup> FE: field experiments; FAO: FAOSTAT national yield statistic; M3: gridded data set of crop specific yields and harvested areas for the year 2000 (Monfreda et al., 2008)

<sup>4</sup> Willmott: maximize Willmott index of agreement (d) and RMSEu>RMSEs (RMSE: root-mean-square error; RMSEu: unsystematic RMSE; RMSEs: systematic RMSE) (Willmott et al., 1985), R2: coefficient of determination

<sup>5</sup> GEPIC & EPIC-IIASA: Default parameters coming with the field scale model EPIC v0810 are mostly used. Potential HI has been adjusted for maize cultivars based on literature and human development index (GEPIC) or major world regions (EPIC-IIASA) and for rice based on literature. Fertilizer application rates have been modified for few countries that report very high yields and low fertilizer use, whereas most of these countries are known for their intensive use of manure.

## Figures

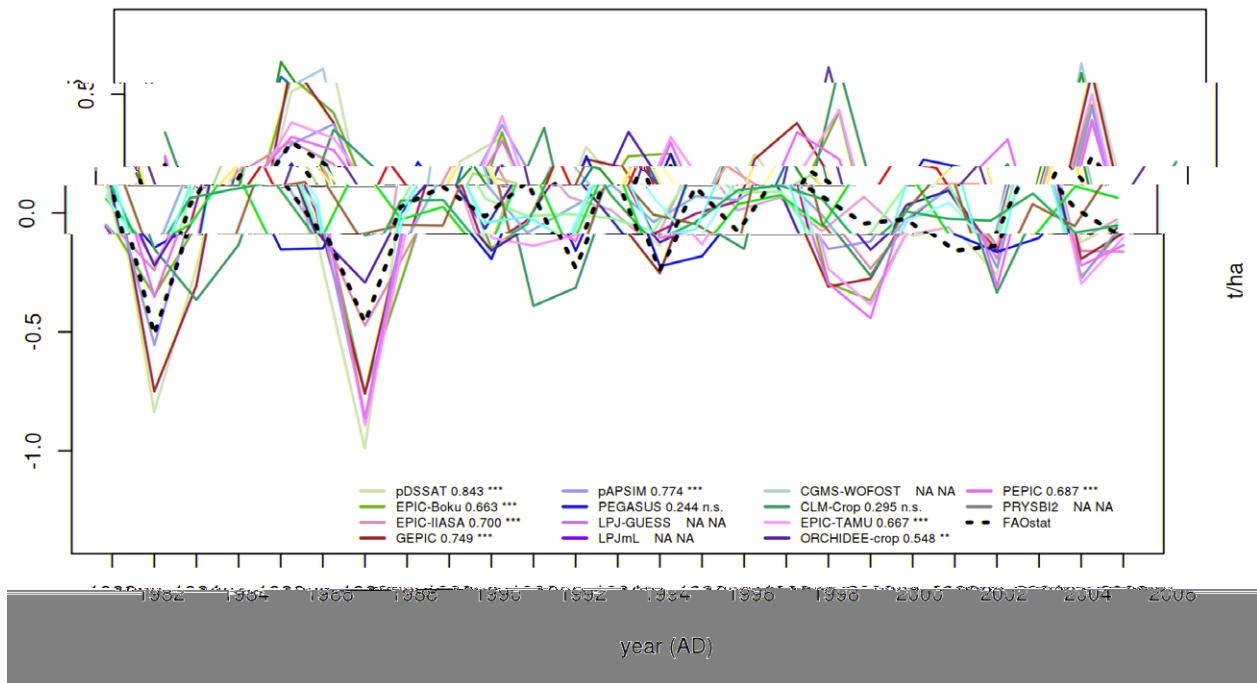

**Figure S 1:** As figure 1 in the main text, but for the maize *fullharm* setting. NA indicates that this model/harmonization combination is not available (Table 2).



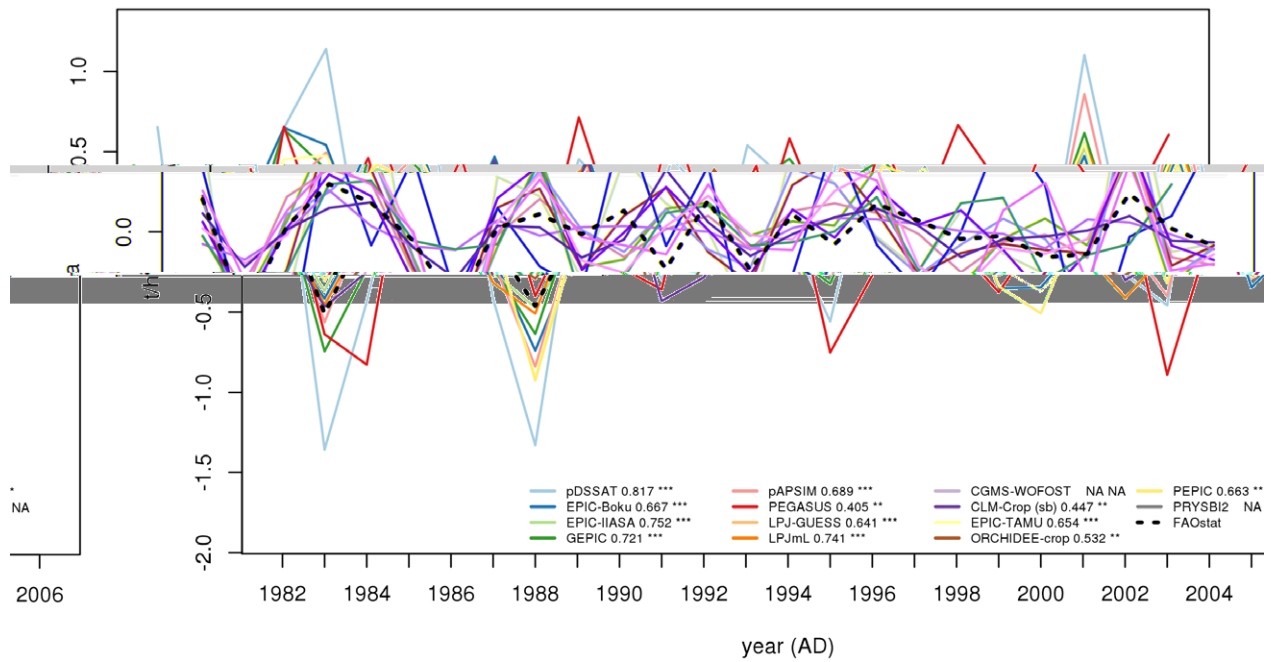

**Figure S 2: As figure 1 in the main text, but for the maize *harm-suffN* setting. NA indicates that this model/harmonization combination is not available (Table 2).**



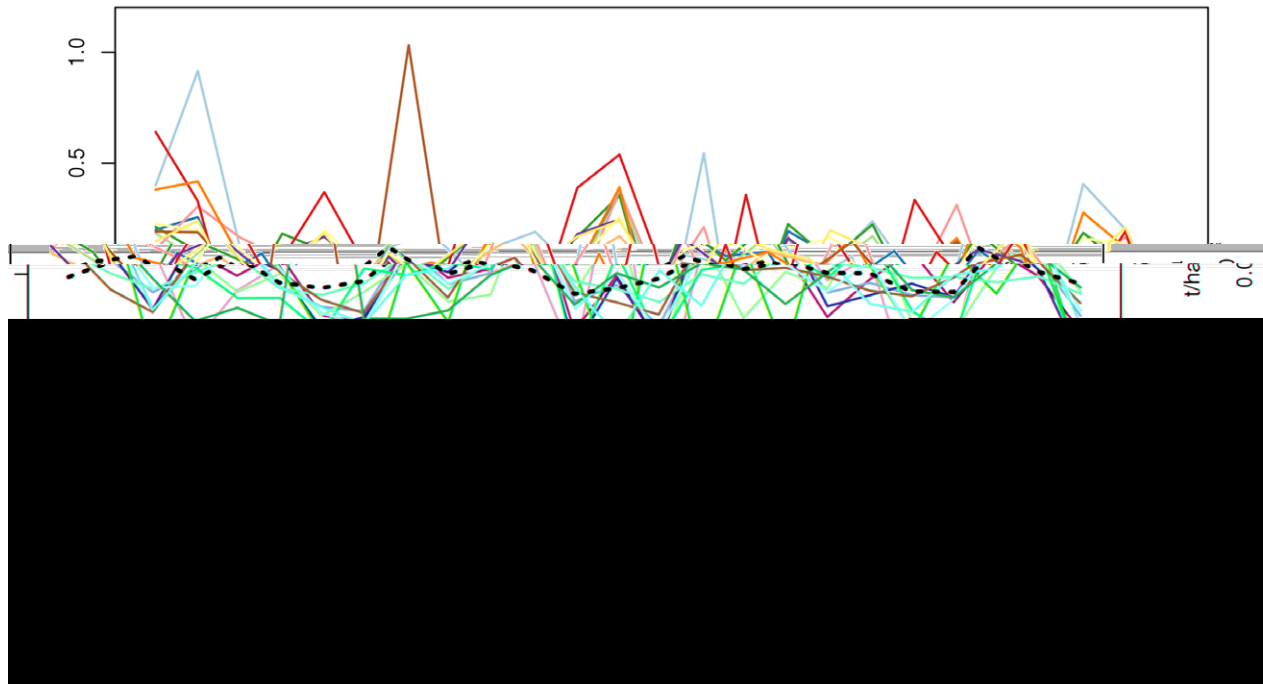

**Figure S 4: As figure 2 in the main text, but for the wheat *harm-suffN* setting. NA indicates that this model/harmonization combination is not available (Table 2).**

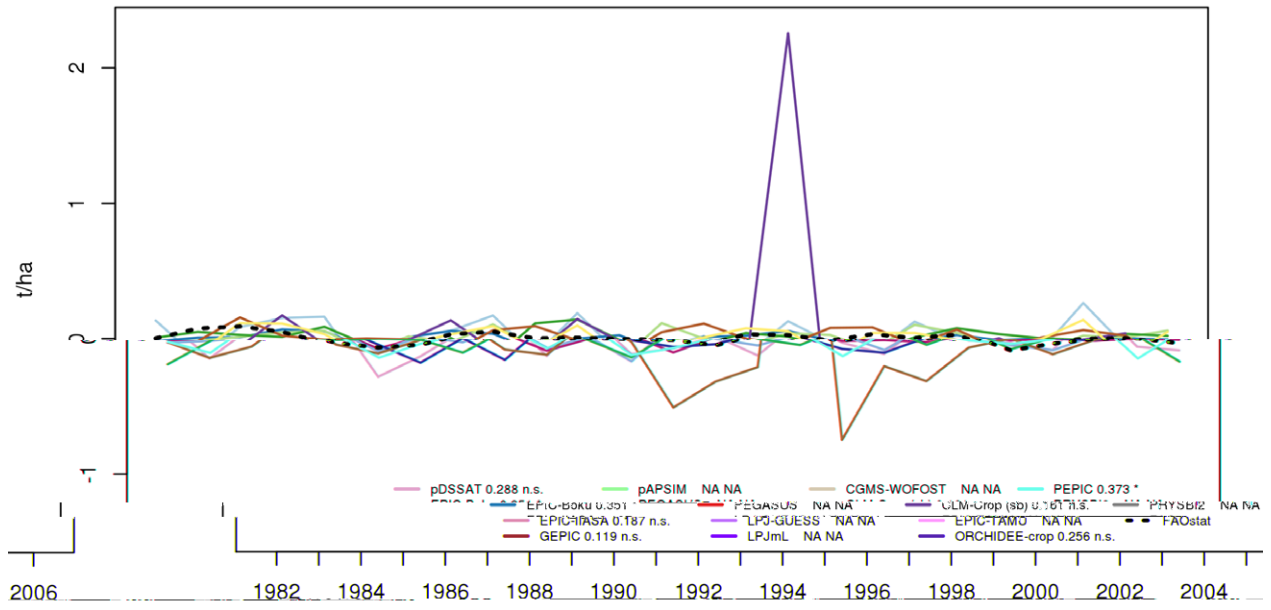

**Figure S 5: As figure 3 in the main text, but for the rice *fullharm* setting. NA indicates that this model/harmonization combination is not available (Table 2).**

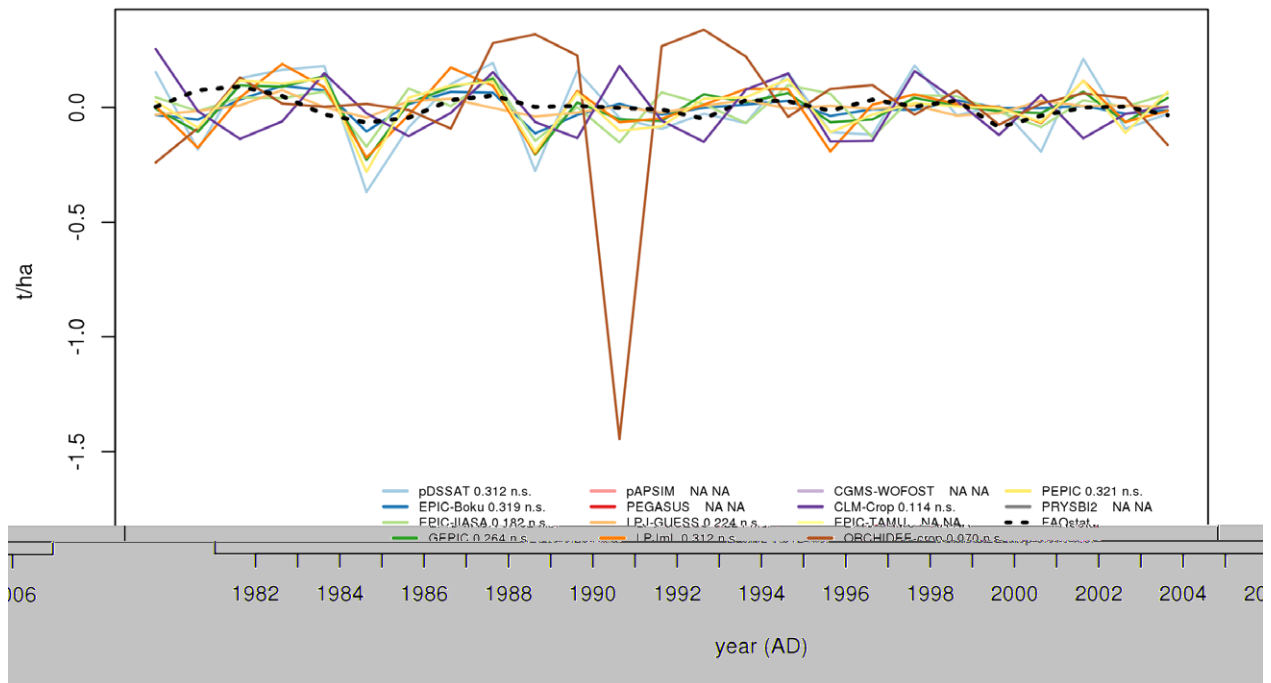

**Figure S 6: As figure 3 in the main text, but for the rice *harm-suffN* setting. NA indicates that this model/harmonization combination is not available (Table 2).**



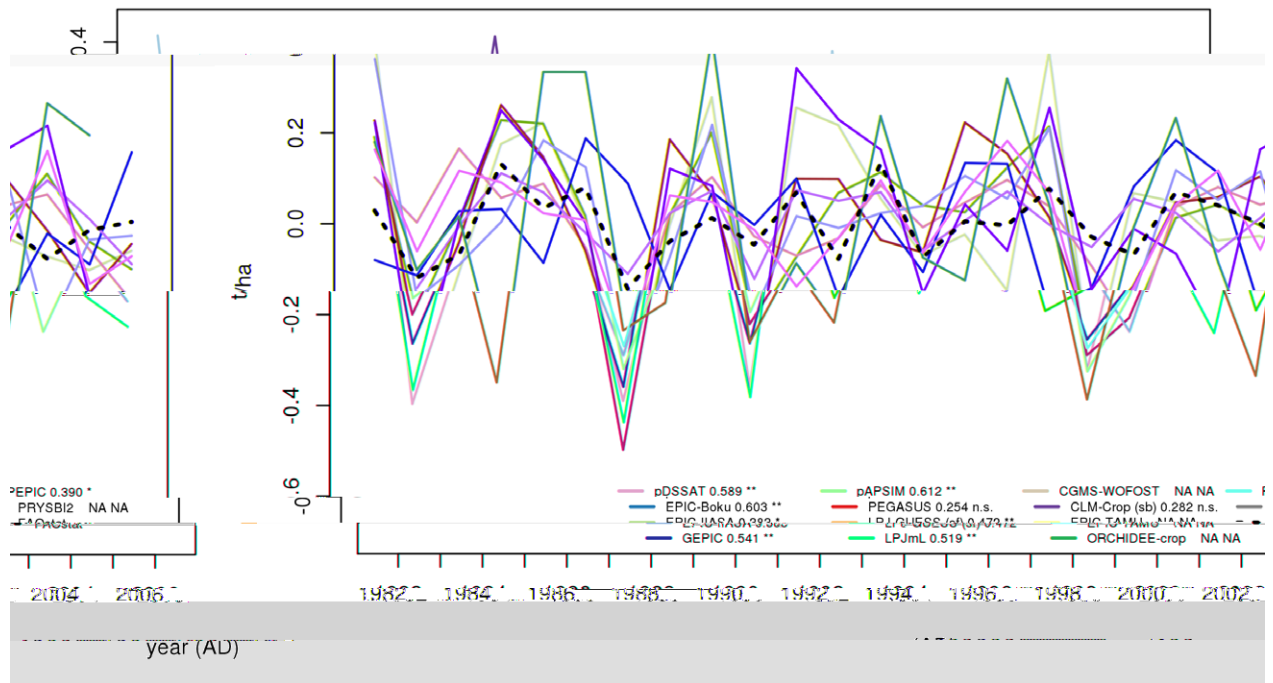

**Figure S 8: As figure 4 in the main text, but for the soybean *harm-suffN* setting. NA indicates that this model/harmonization combination is not available (Table 2).**

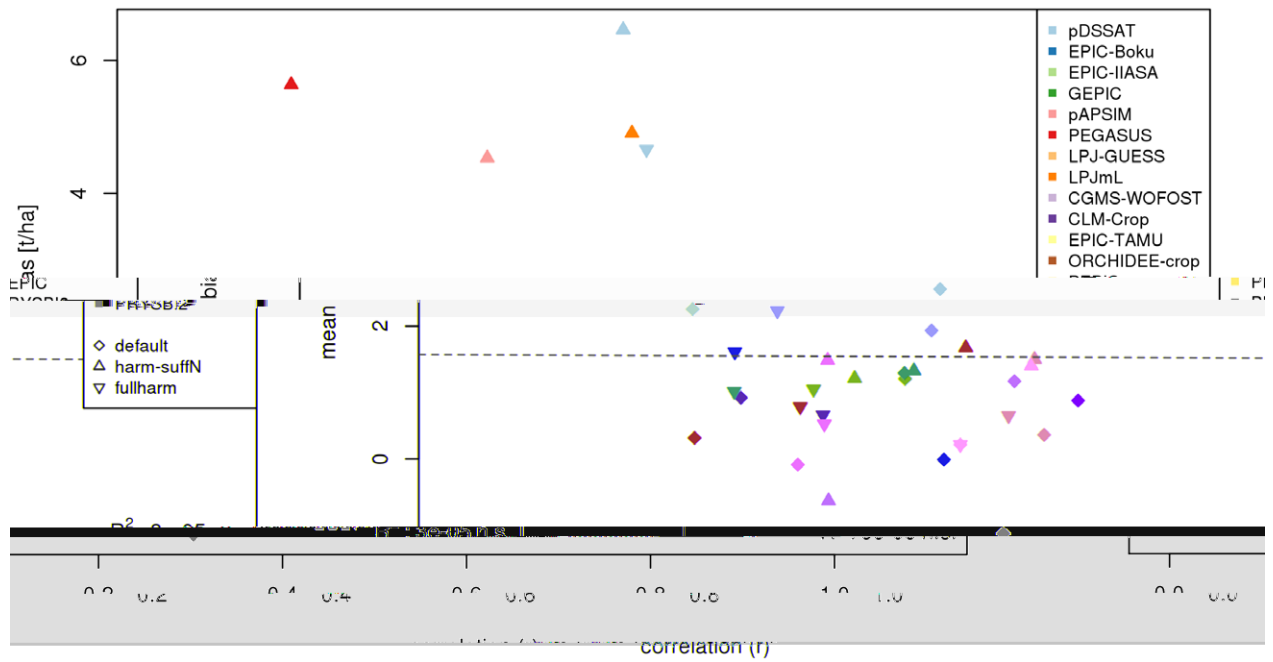

Figure S 9: As figure 5 in the main text, but for wheat.



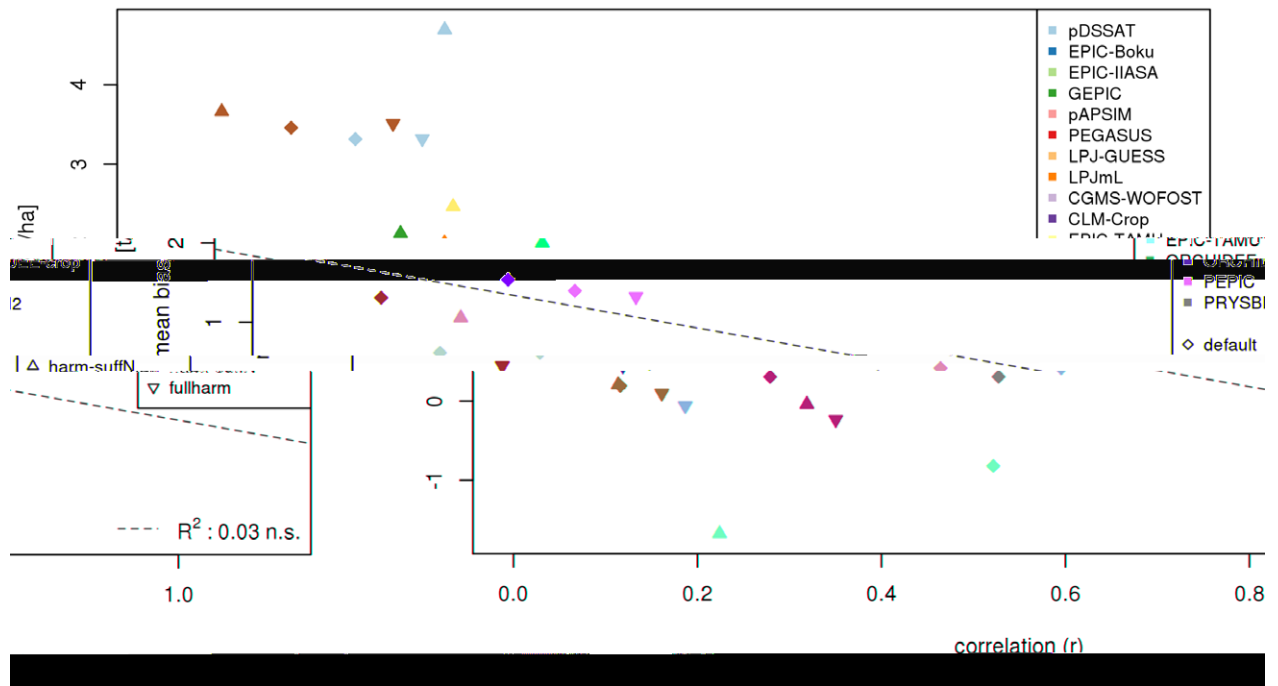

Figure S 10: As figure 5 in main text, but for rice.

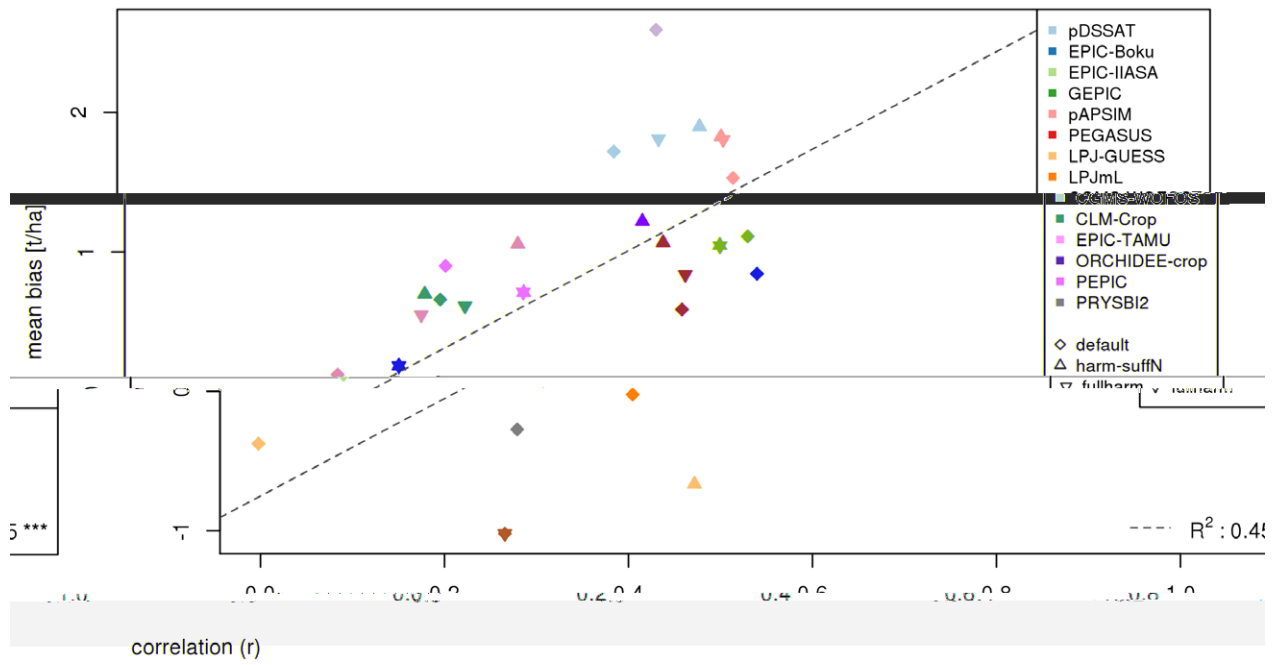

**Figure S 11: As figure 5 in main text, but for soybean.**

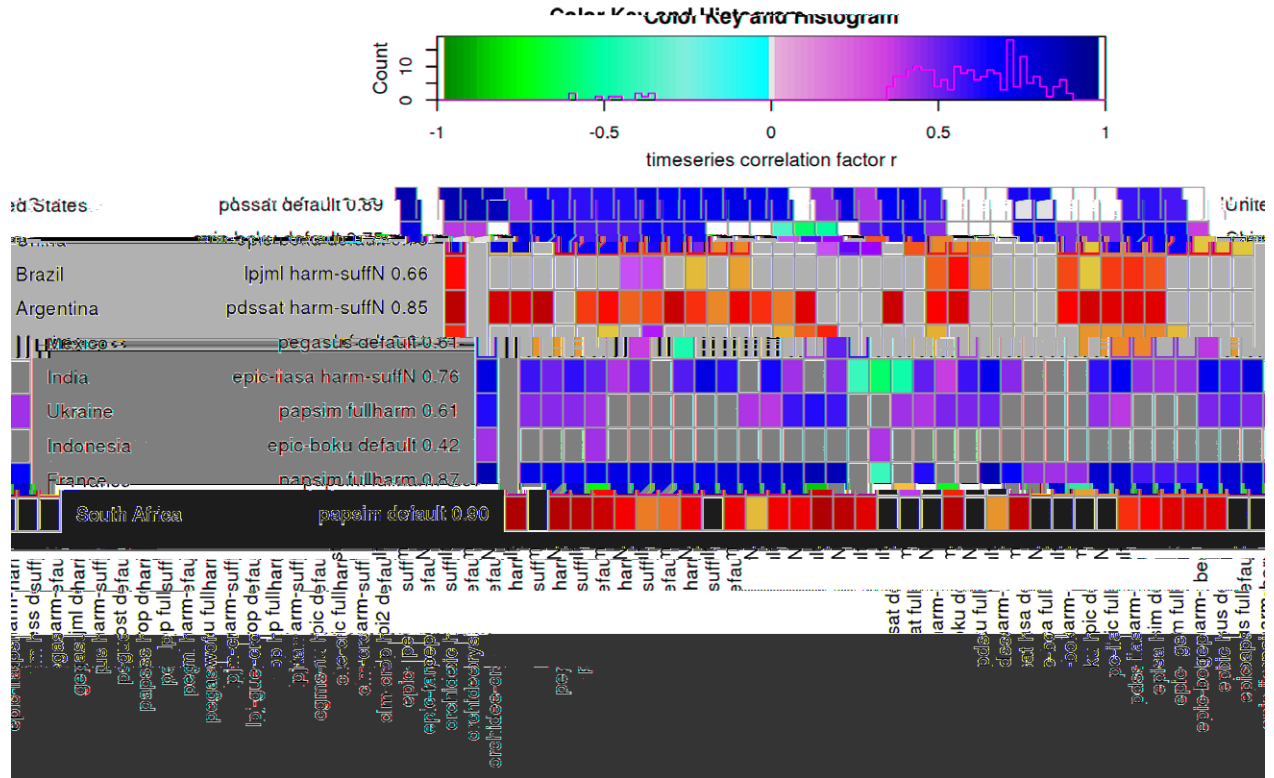

Figure S 12: As figure 6 in main text, but without allowing for time shifts of one year in the correlation analysis.







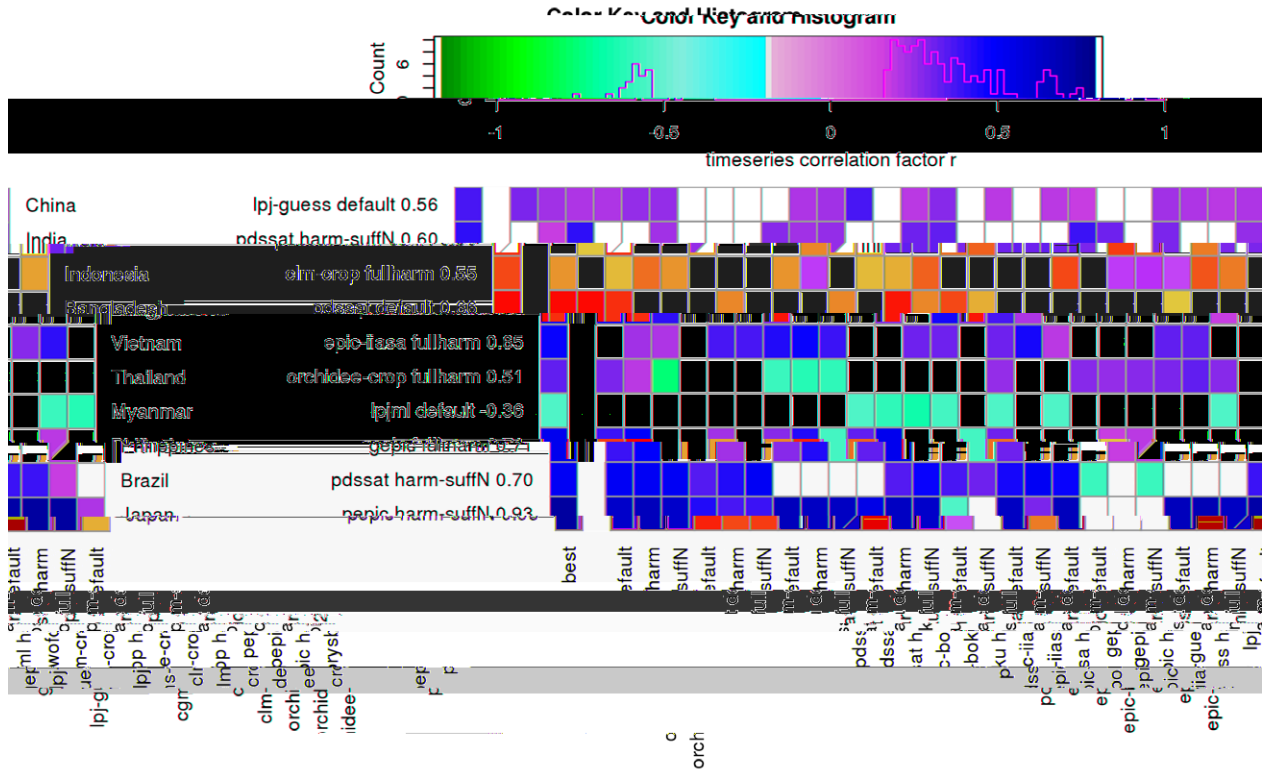

Figure S 17: As figure 6 in main text, but for rice.

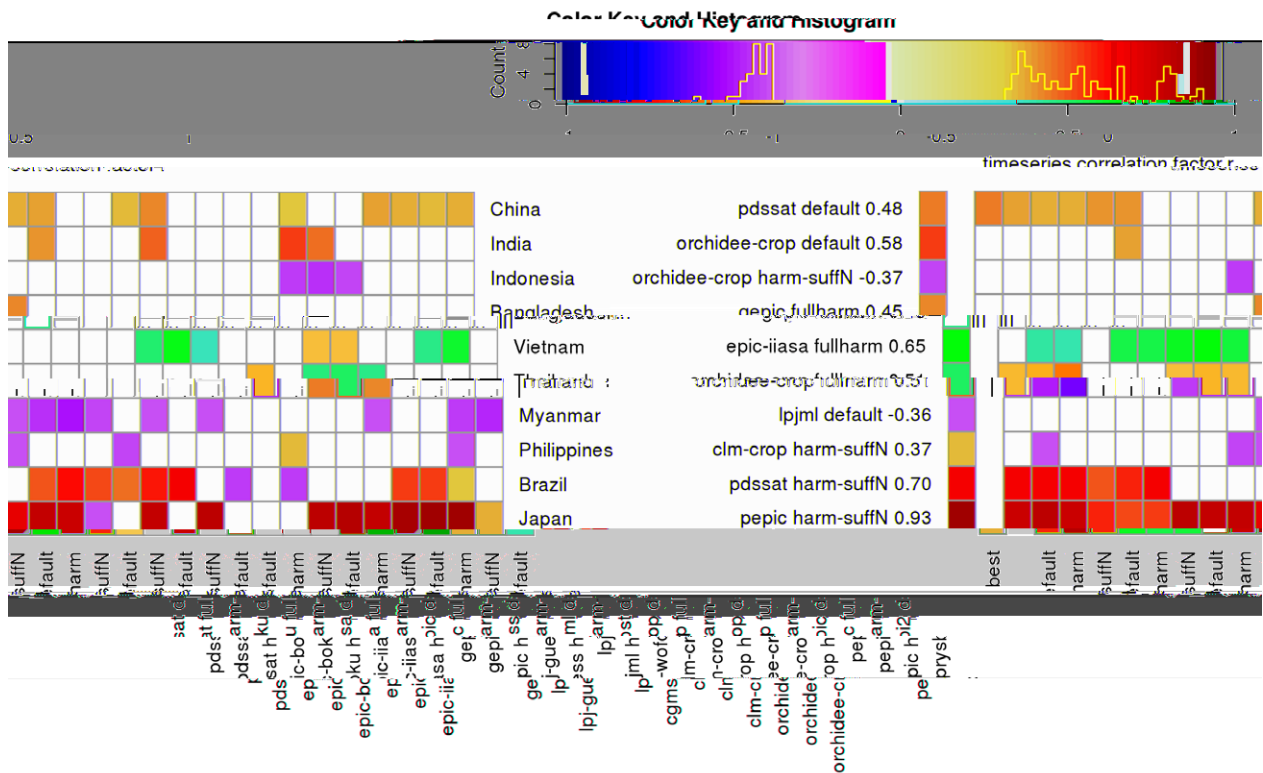

Figure S 18: As Figure S12, but for rice.







Figure S 19: As Figure S13, but for rice.

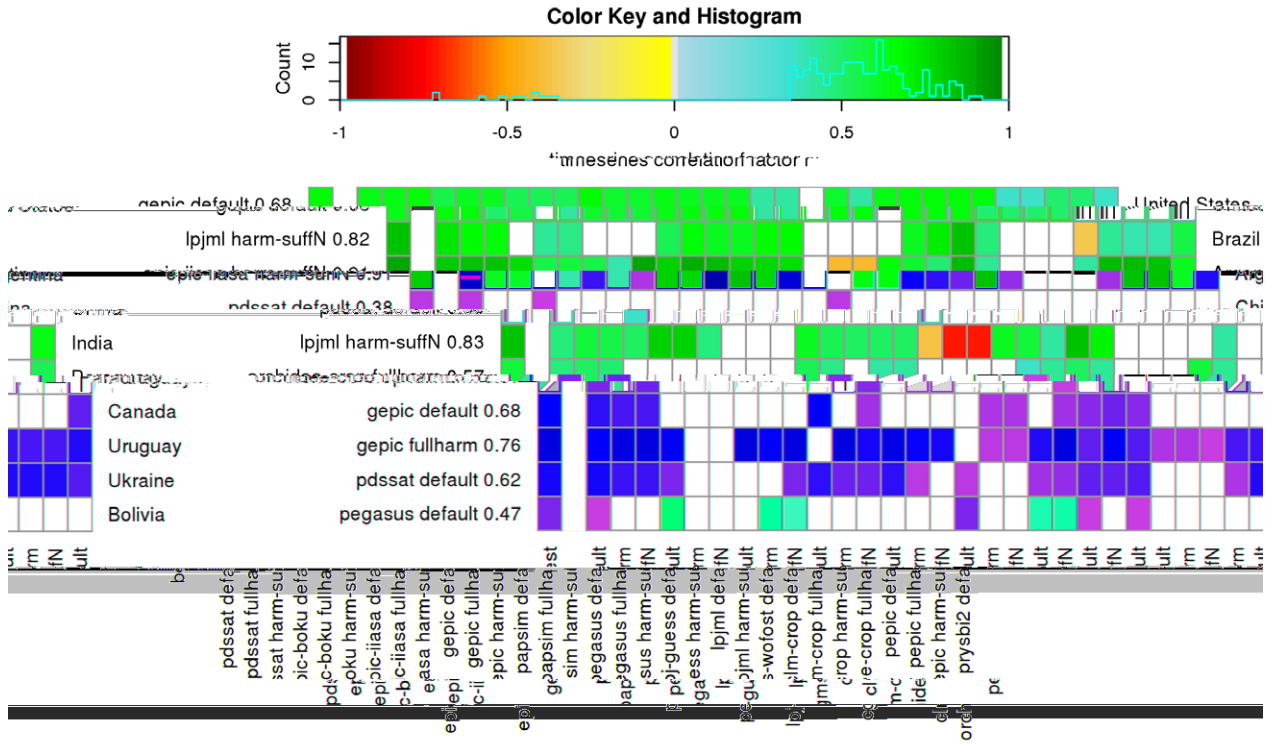

Figure S 20: As figure 6 in main text, but for soybean.

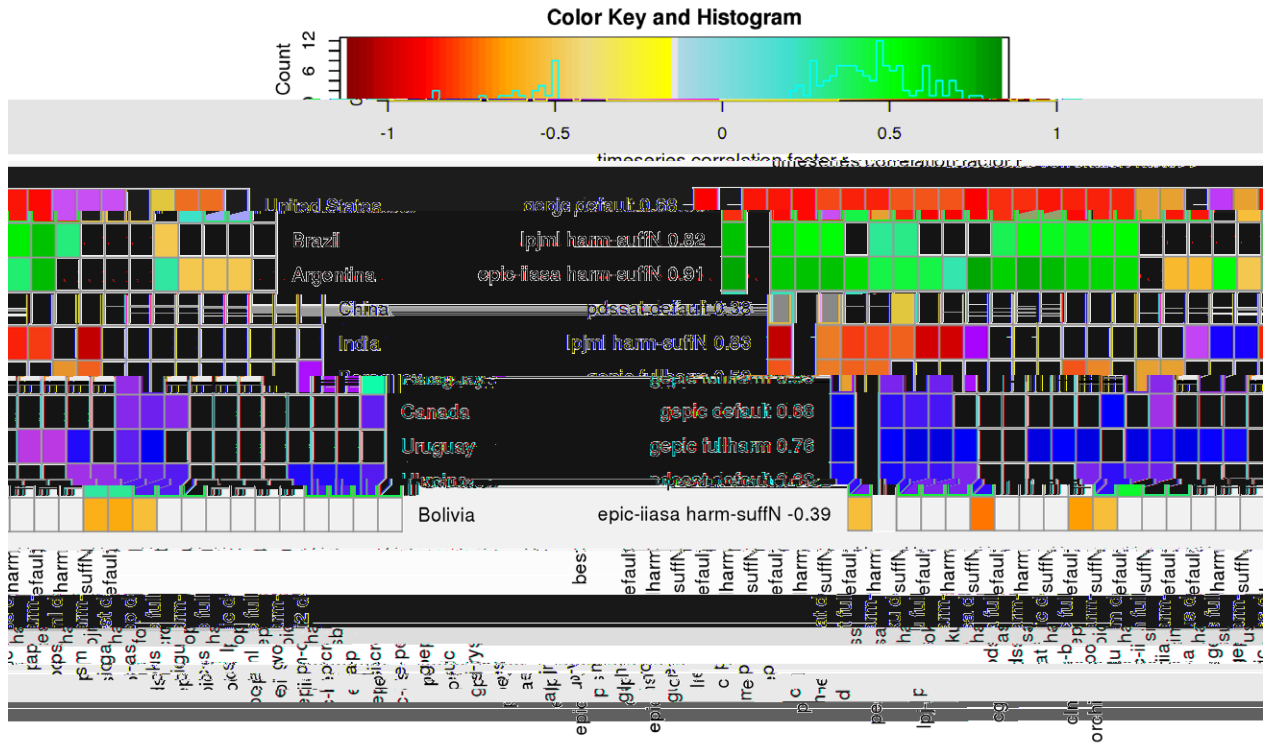

Figure S 21: As Figure S12, but for soybean.

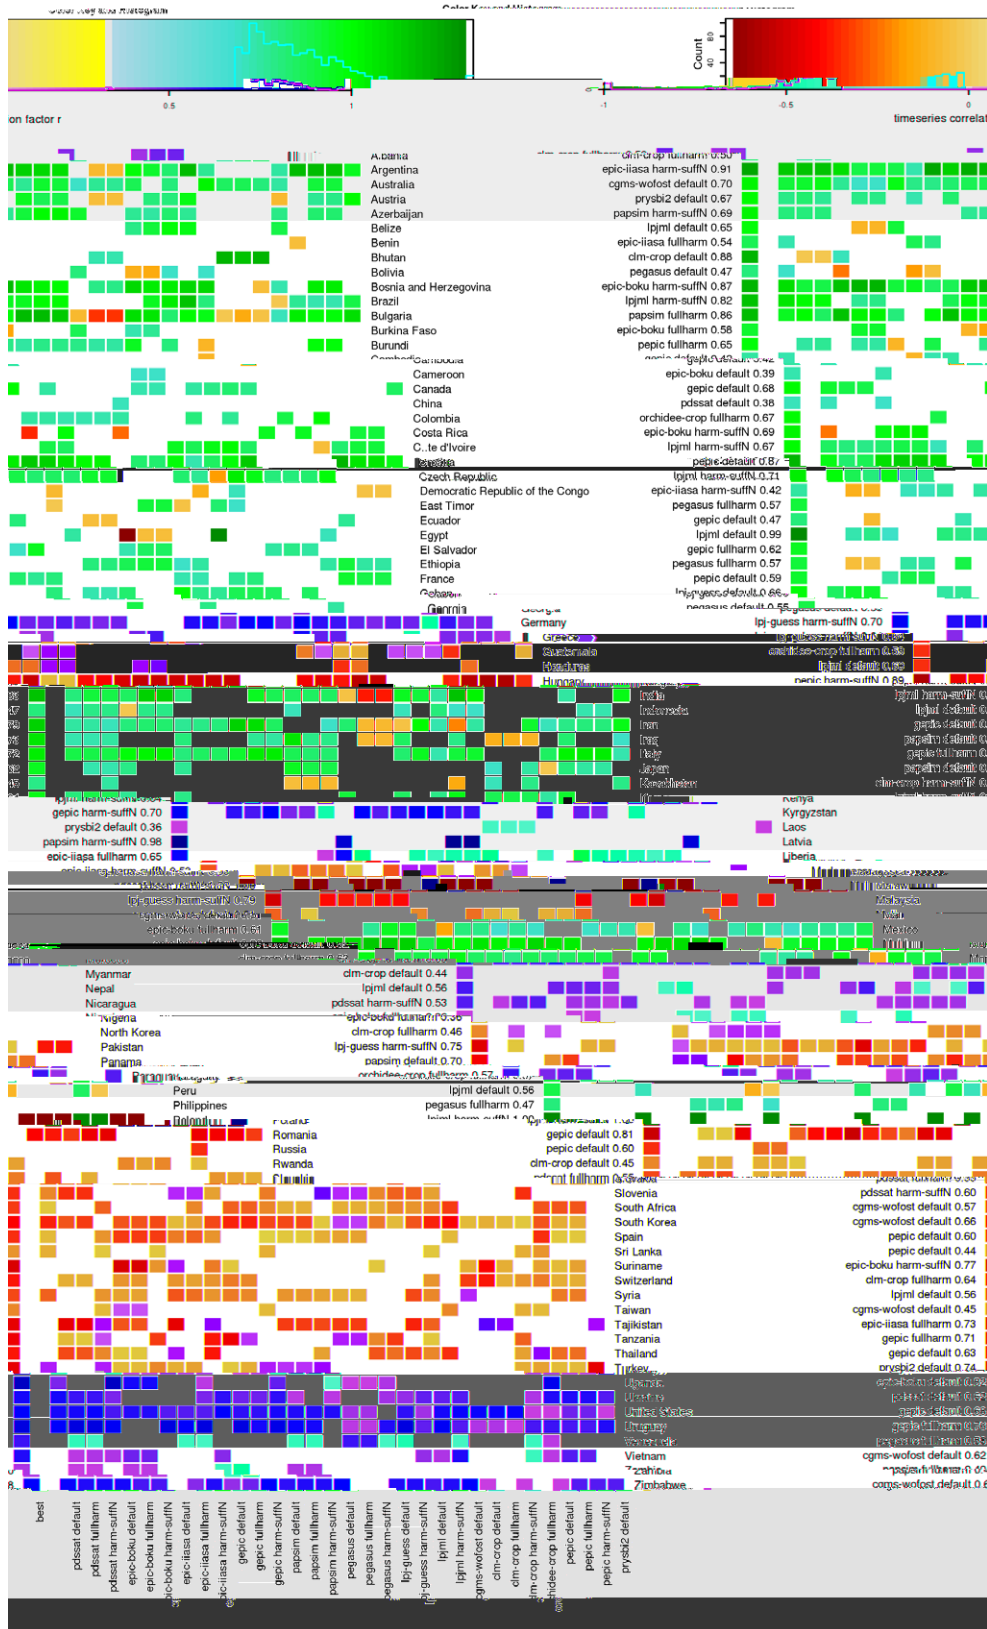

Figure S22: As Figure S13, but for soybean.







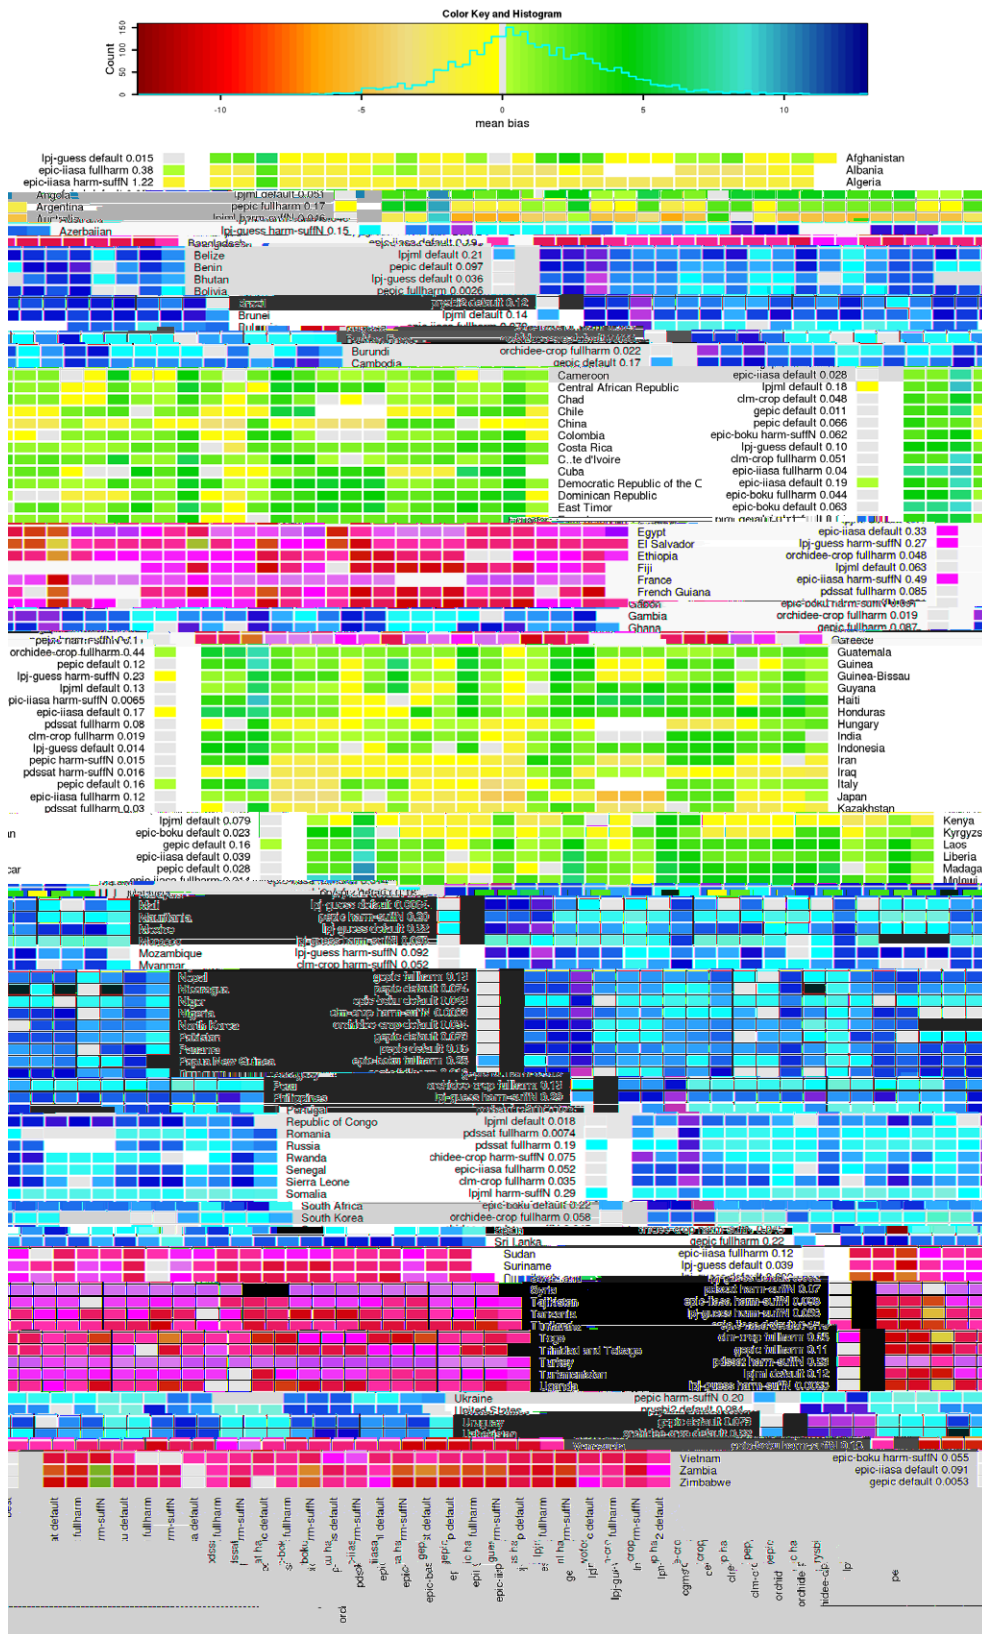

Figure S25: As Figure S23 but for rice.



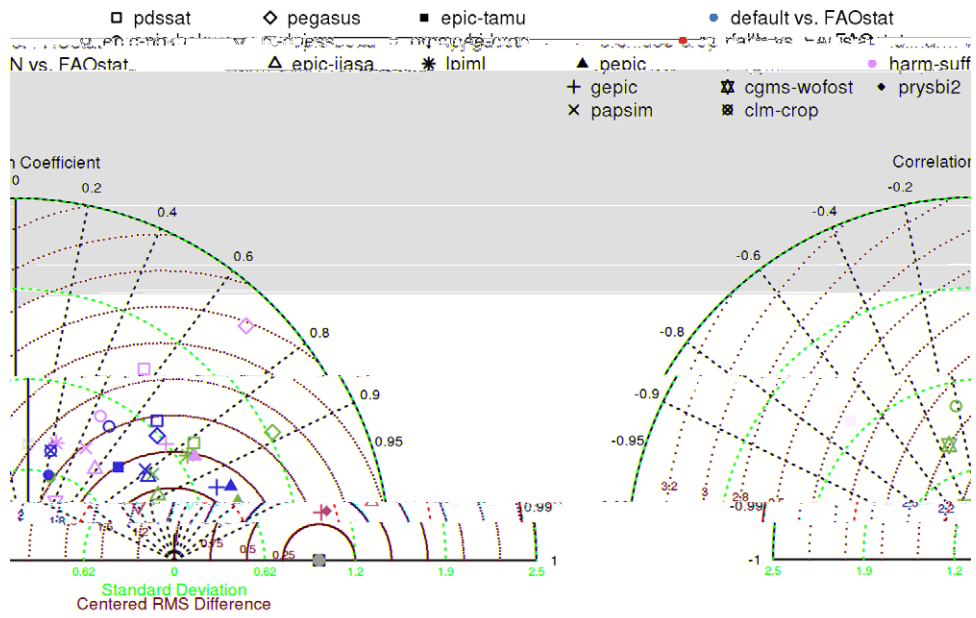

**Figure S 27: As figure 8 in main text, but with flattened time dimension. Instead of individual values for each year, we here use the multi-annual mean per country only, focusing on the correlations, variance and RMSD of the spatial pattern only.**

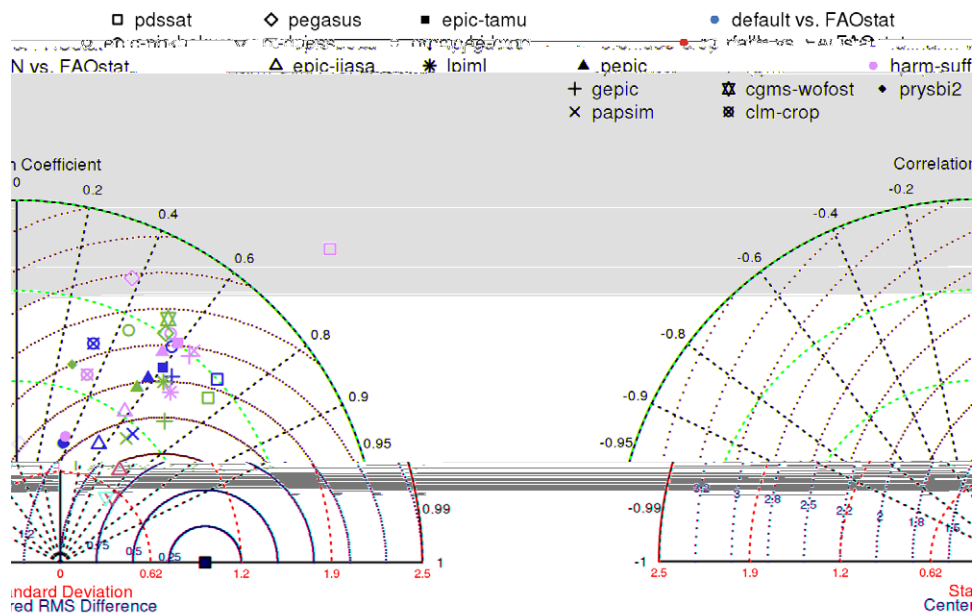

**Figure S 28: As figure 8 in main text, but after removing national means. By removing national mean yields, spatial differences between countries are eliminated (all with mean of zero) so that the analysis explicitly focuses on the year-to-year variability.**



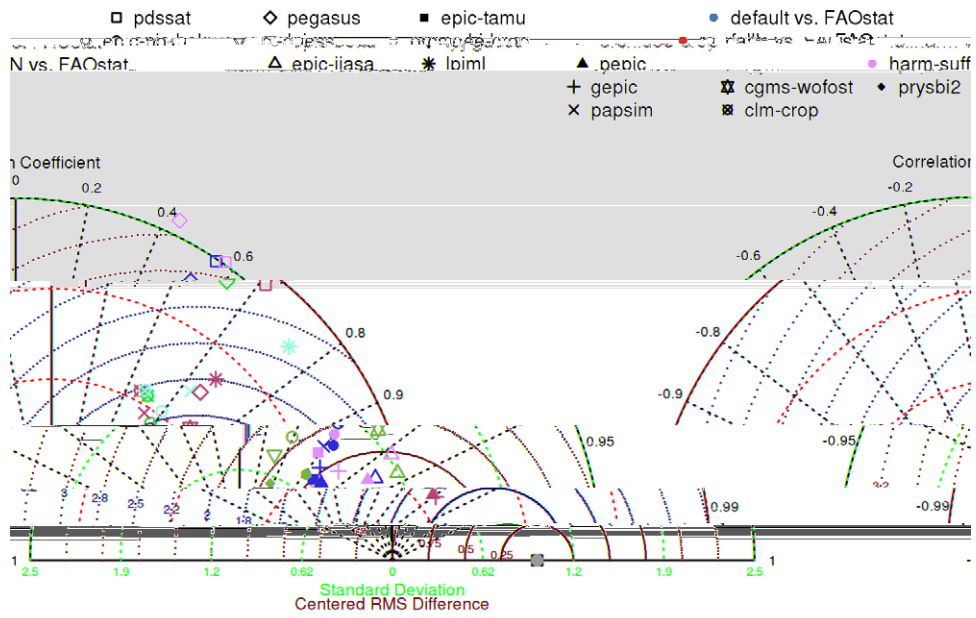

Figure S 29: As figure 8 in main text, but for wheat.

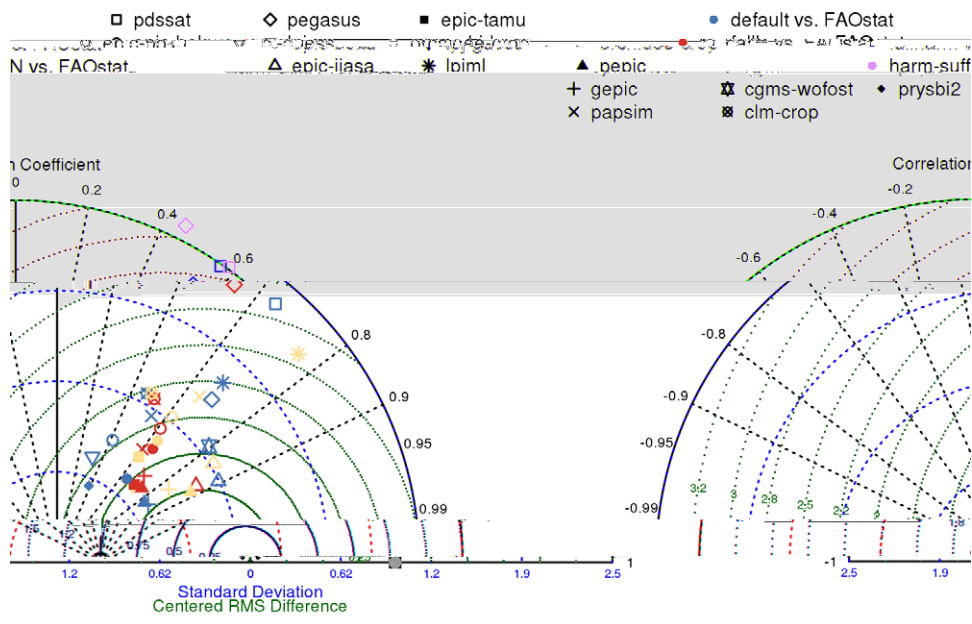

**Figure S 30: As Figure S27, but for wheat.**

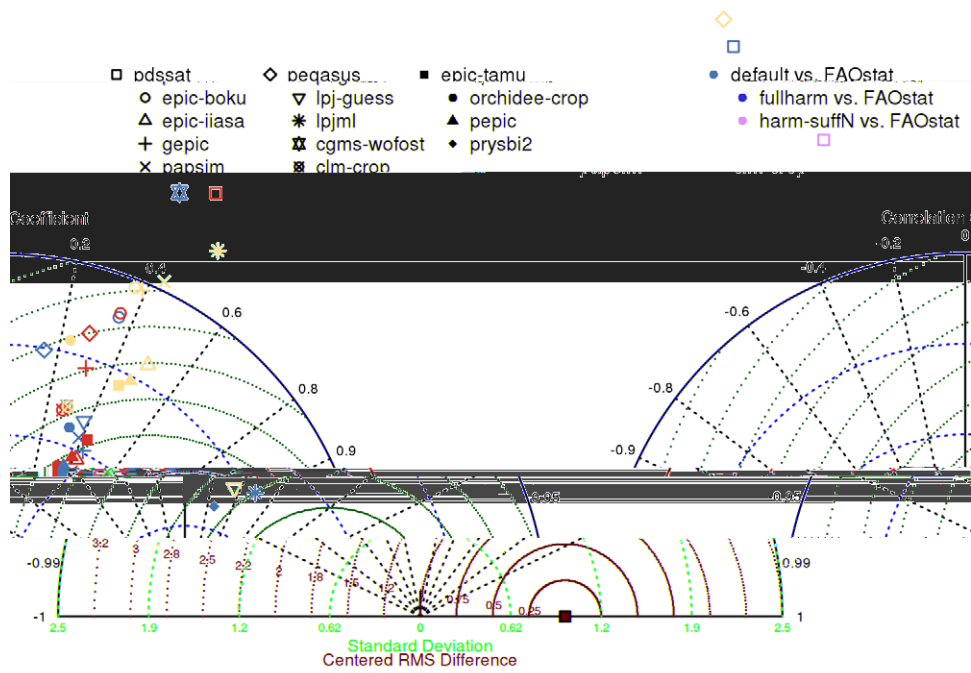

**Figure S 31: As Figure S28, but for wheat.**

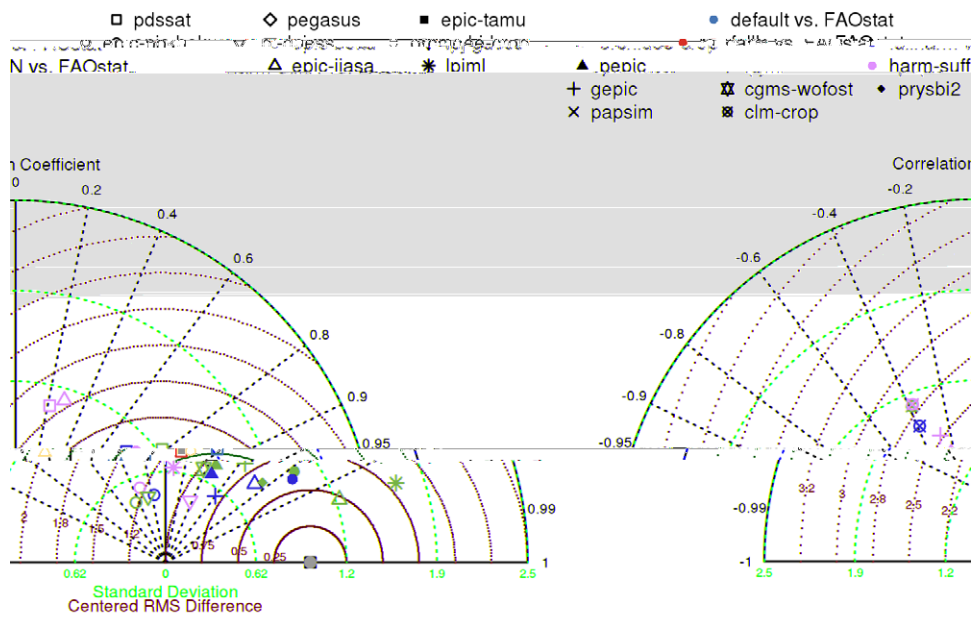

**Figure S 32: As figure 8 in main text, but for rice**

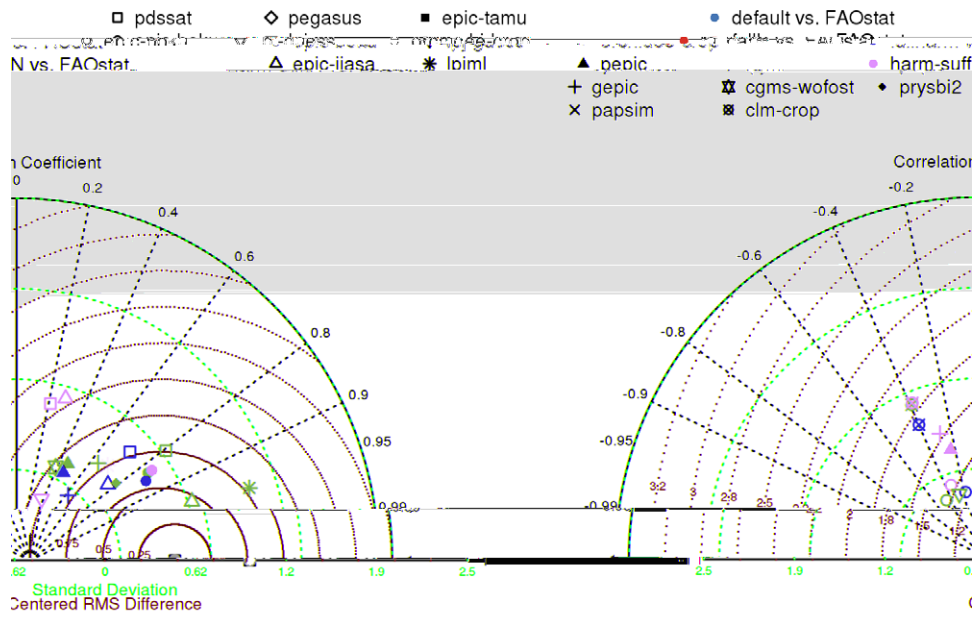

Figure S 33: As Figure S27, but for rice.

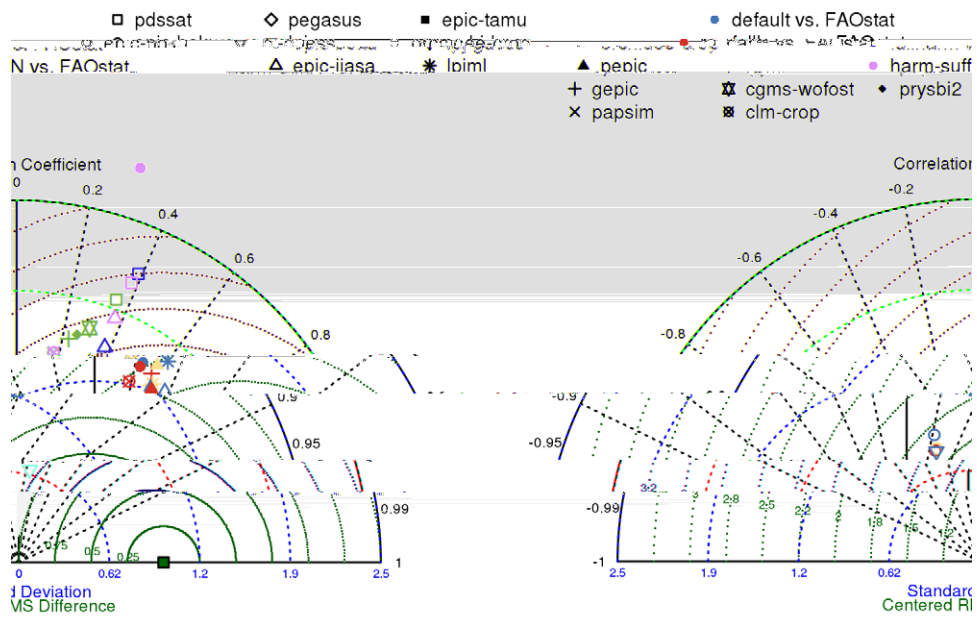

**Figure S 34: As Figure S28, but for rice.**

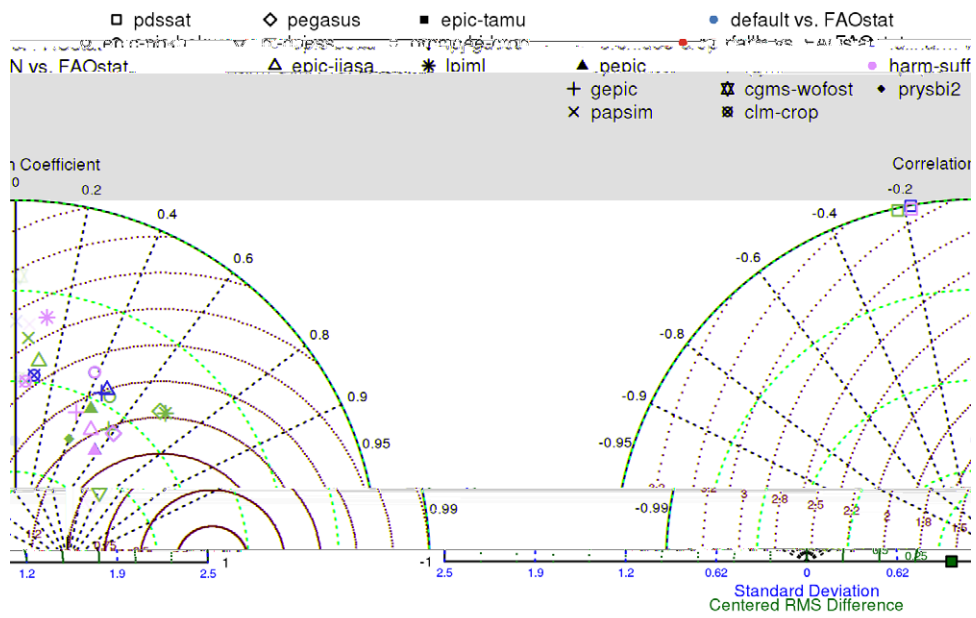

**Figure S 35: As figure 8 in main text, but for soybean.**

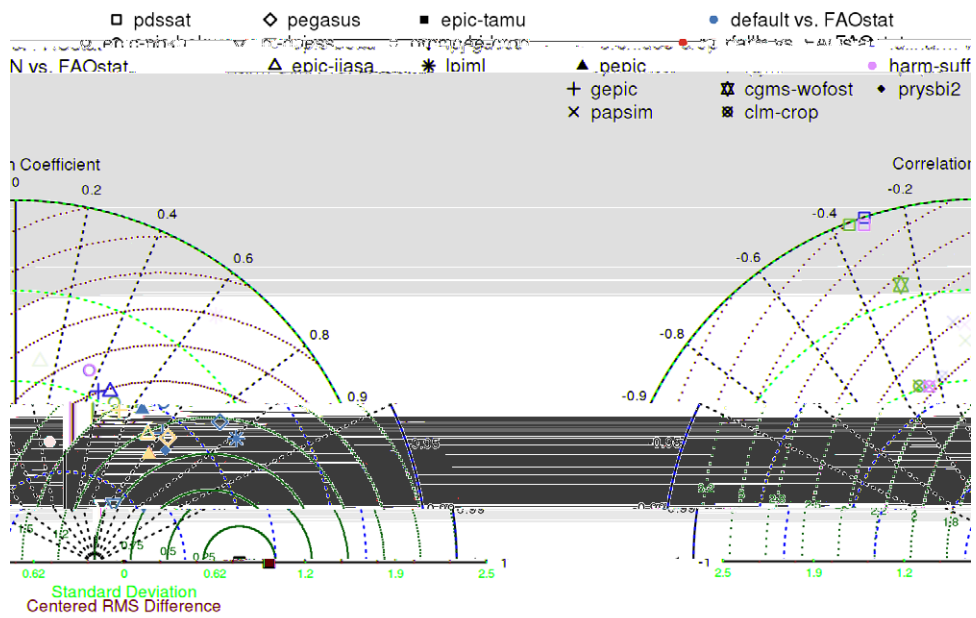

Figure S 36: As Figure S27, but for soybean.



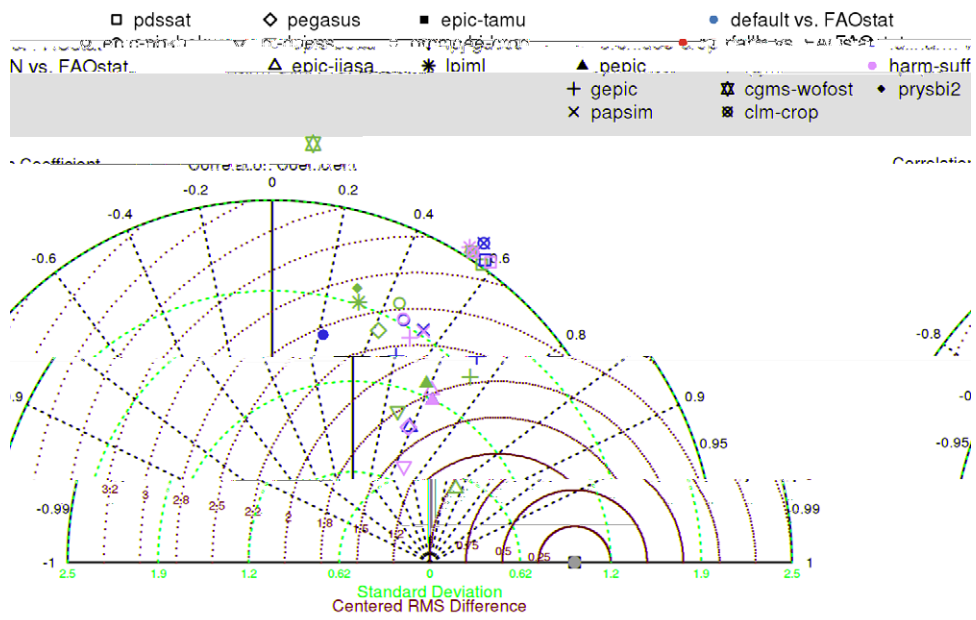

**Figure S 37: As Figure S28, but for soybean.**

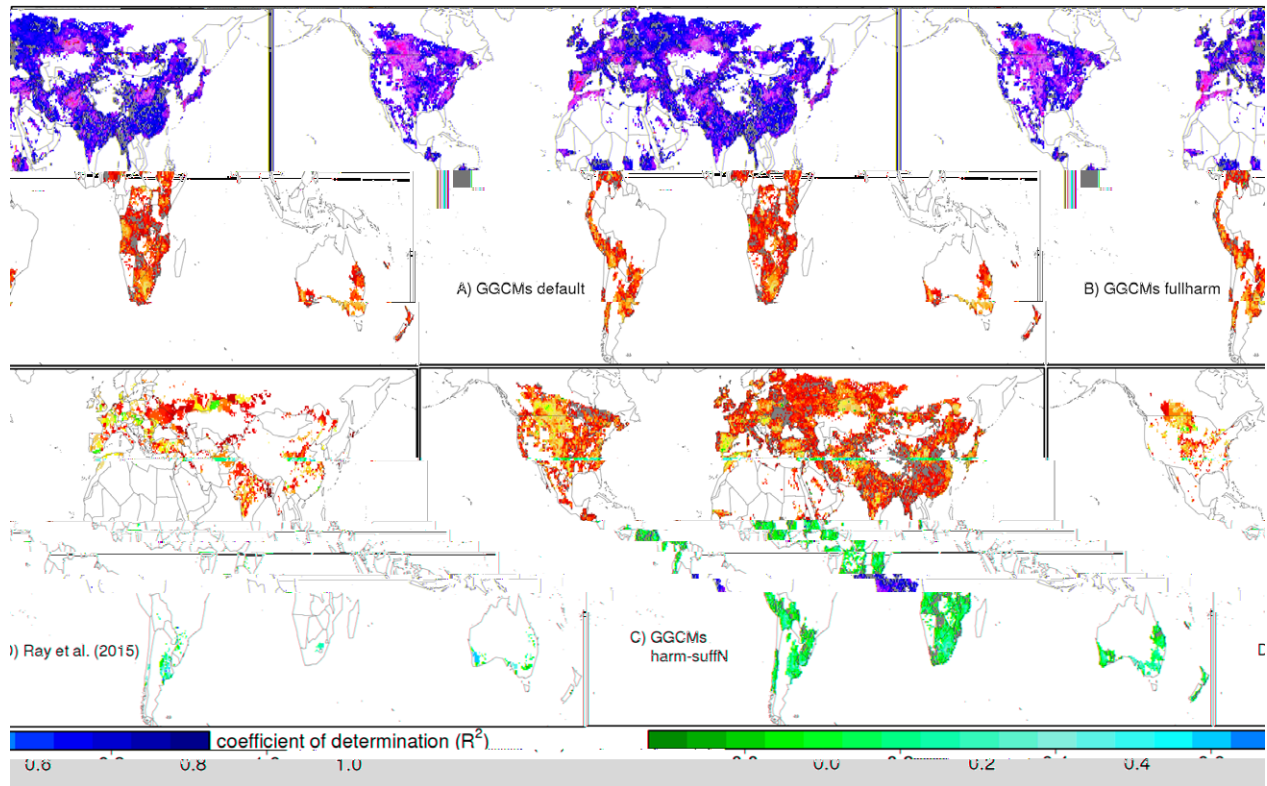

**Figure S 38: As figure 10 in main text, but for wheat.**

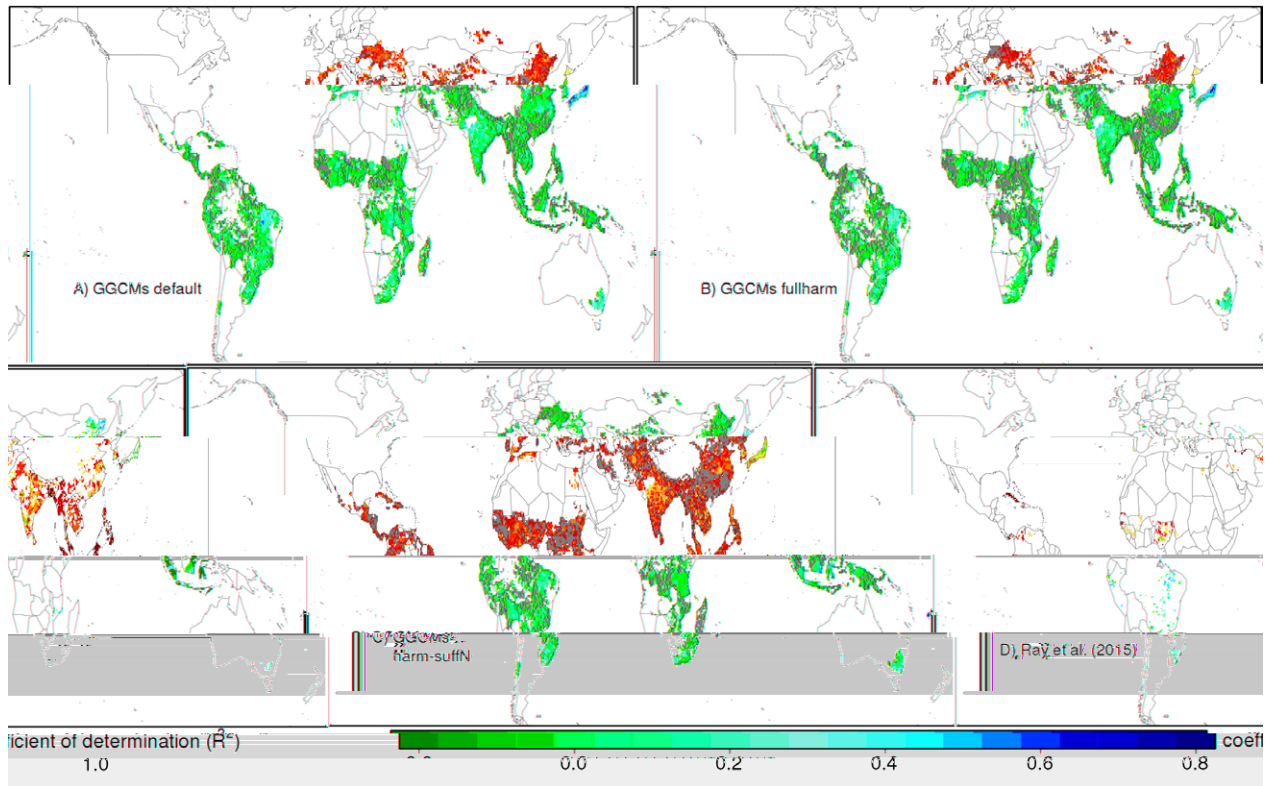

**Figure S 39: As figure 10 in main text, but for rice.**

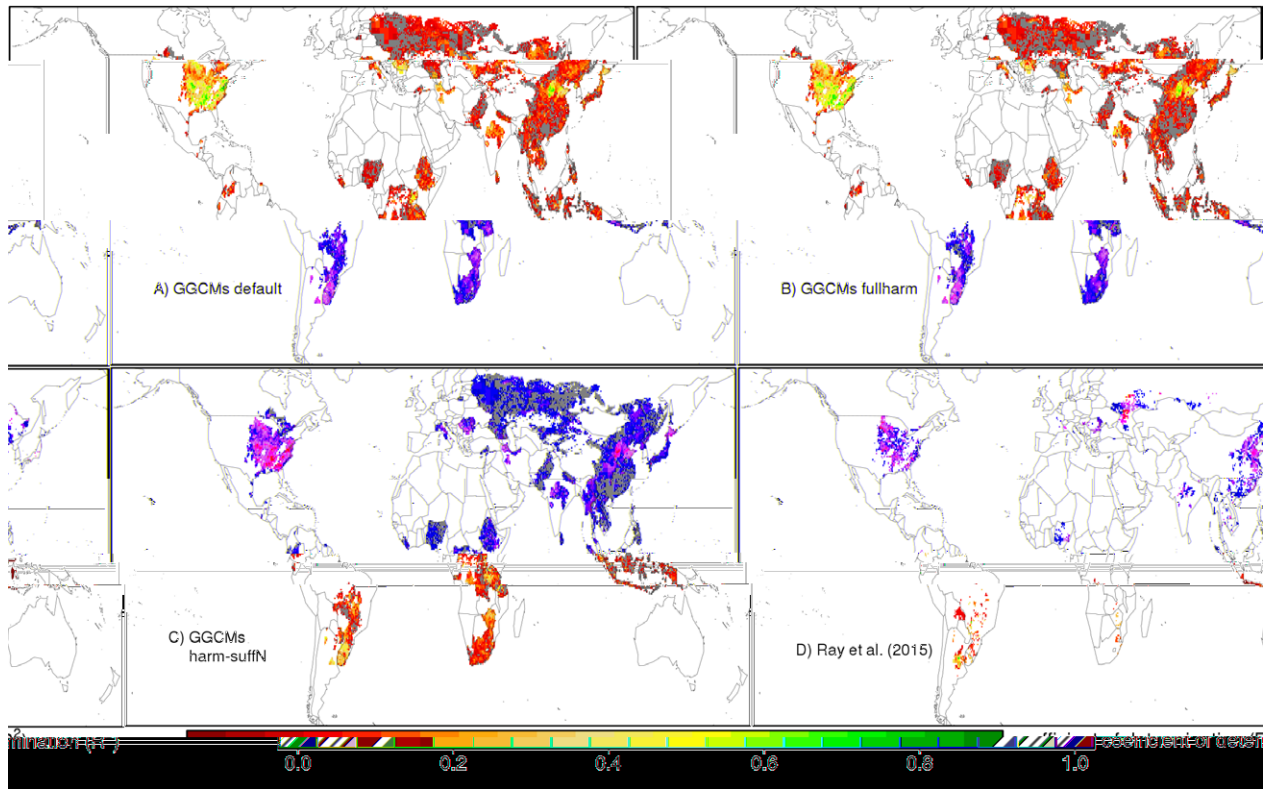

**Figure S 40: as figure 10 in main text, but for soybean.**

**Figure S 41: as figure 10 in main text, but for pDDSAT only.**

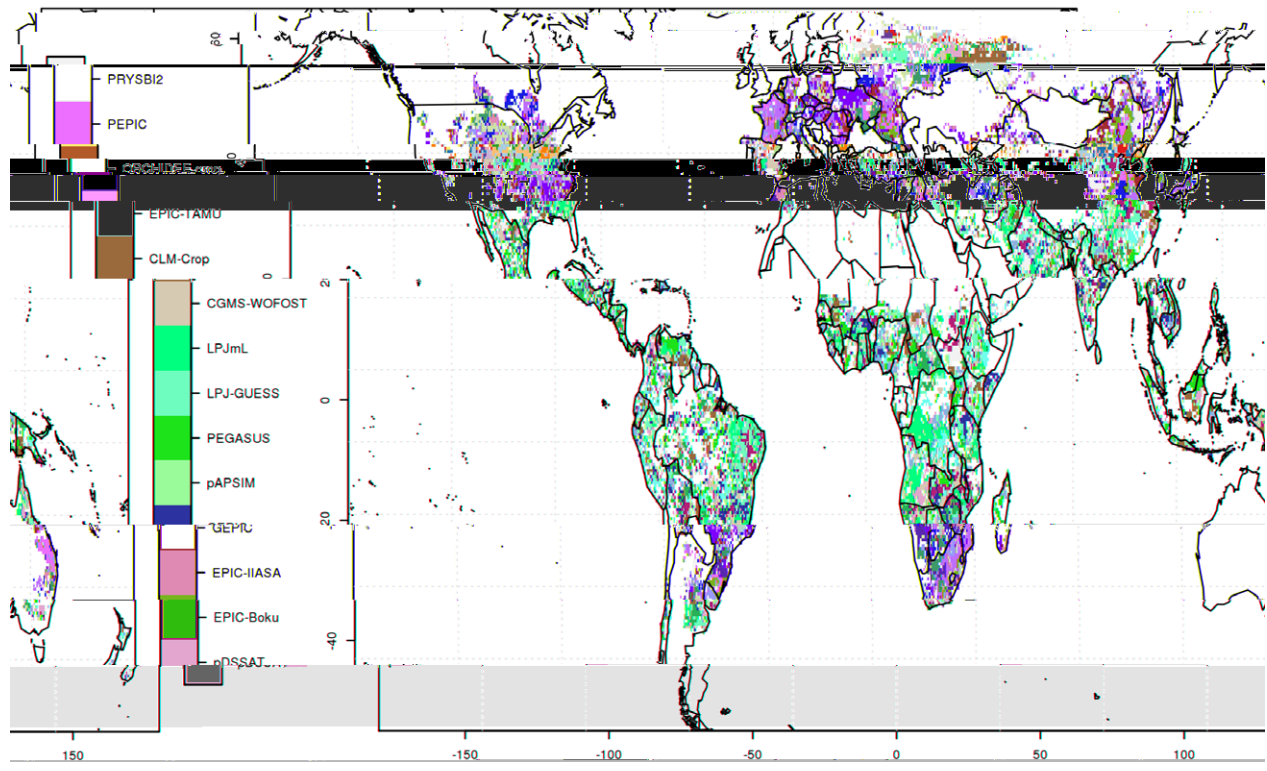

**Figure S 42: Best performing ( $R^2$ ) GGCM per grid cell for maize (*default*).**  
 Individual GGCMs are depicted by color. White areas are either outside cropping areas or none of the GGCMs achieves a statistically significant correlation with the Ray et al. (2015) data set.

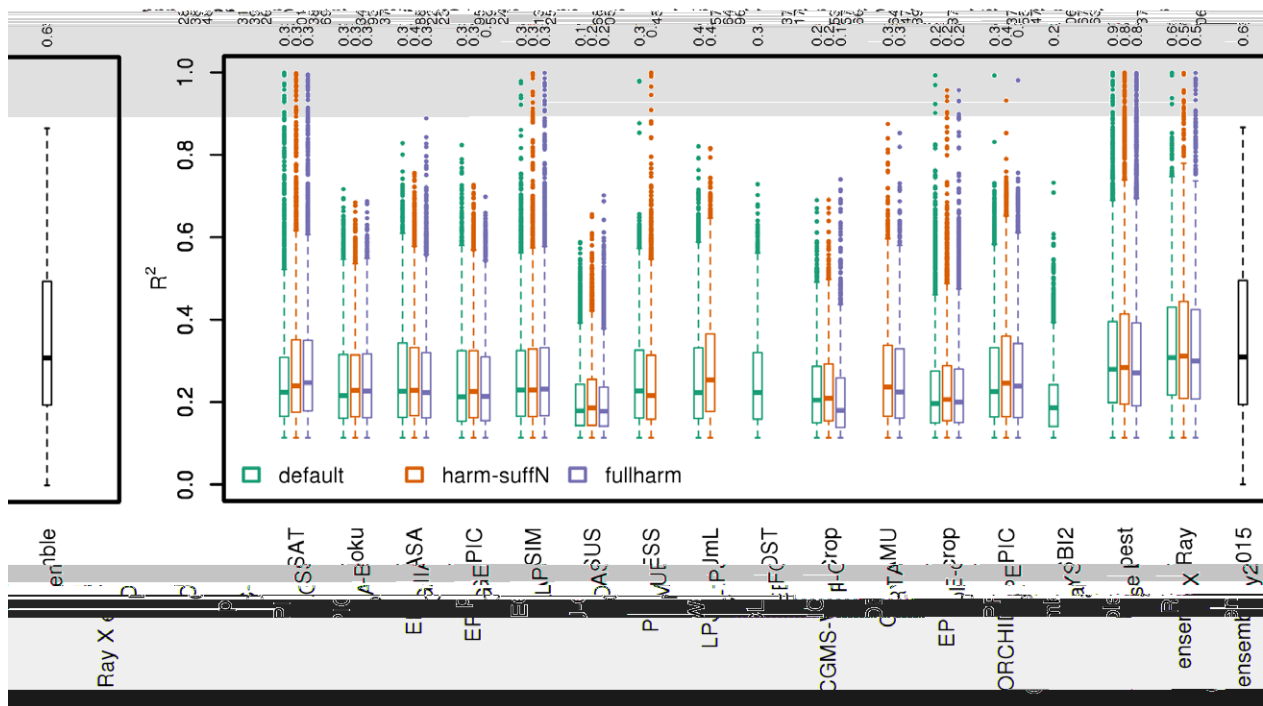

Figure S 43: as figure 11 in main text, but for wheat.





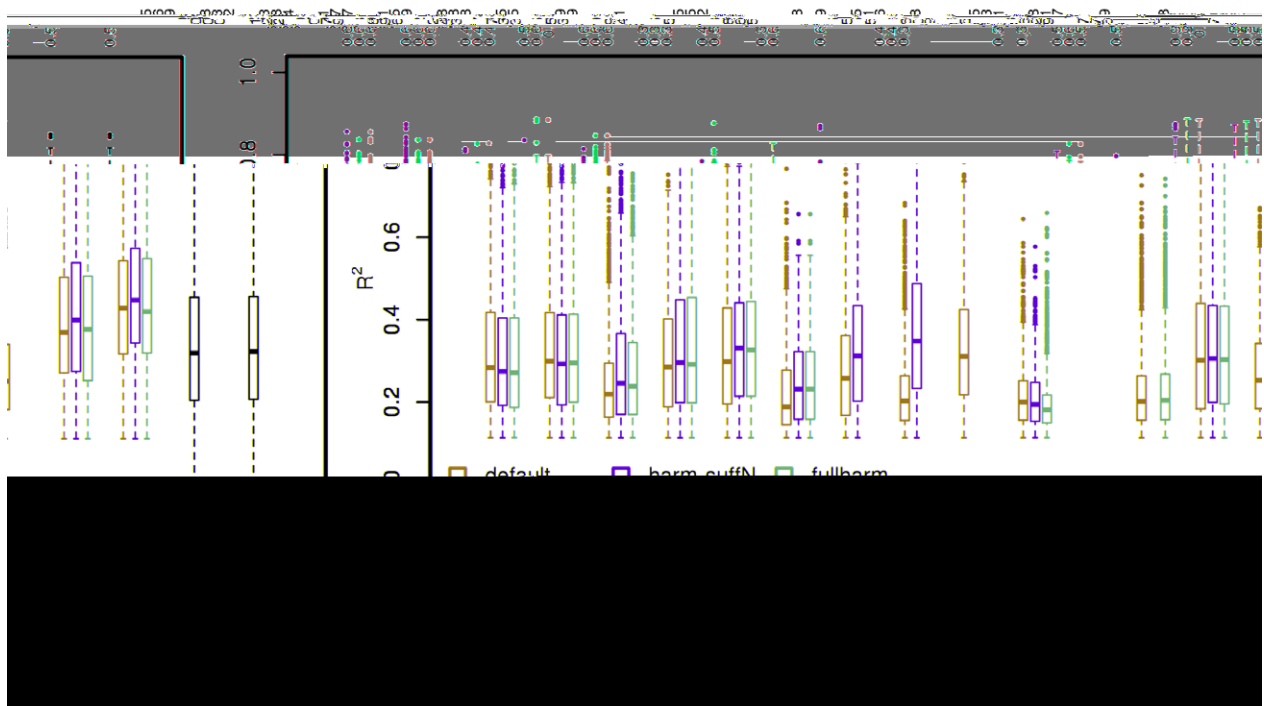

Figure S 45: as figure 11 in main text, but for soybean.

## References

- Adam, M., Van Bussel, L. G. J., Leffelaar, P. A., Van Keulen, H., and Ewert, F.: Effects of modelling detail on simulated potential crop yields under a wide range of climatic conditions, *Ecological Modelling*, 222, 131-143, 2011.
- Batjes, N. H.: ISRIC-WISE derived soil properties on a 5 by 5 arc-minutes global grid (version 1.1), SRIC – World Soil Information, Wageningen, Netherlands, 2006.
- Cosby, B. J., Hornberger, G. M., Clapp, R. B., and Ginn, T. R.: A statistical exploration of the relationships of soil moisture characteristics to the physical properties of soils, *Water Resour. Res.*, 20, 682-690, 1984.
- Deryng, D., Conway, D., Ramankutty, N., Price, J., and Warren, R.: Global crop yield response to extreme heat stress under multiple climate change futures, *Environmental Research Letters*, 9, 034011, 2014.
- Deryng, D., Sacks, W. J., Barford, C. C., and Ramankutty, N.: Simulating the effects of climate and agricultural management practices on global crop yield, *Global Biogeochemical Cycles*, 25, GB2006, 2011.
- Dobos, E.: Albedo, In *Encyclopedia of Soil Science*, Second Edition., 2006. 64-66, 2006.
- Farquhar, G. D., von Caemmerer, S., and Berry, J. A.: A biochemical model of photosynthetic CO<sub>2</sub> assimilation in leaves of C<sub>3</sub> species, *Planta*, 149, 78-90, 1980.
- Fischer, G., Nachtergaele, F., Prieler, S., van Velthuisen, H. T., Verelst, L., and Wiberg, D.: Global Agro-ecological Zones Assessment for Agriculture (GAEZ 2008). IIASA, Laxenburg, Austria and FAO, Rome, Italy, 2008.
- Hall, F. G., Brown de Colstoun, E., Collatz, G. J., Landis, D., Dirmeyer, P., Betts, A., Huffman, G. J., Bounoua, L., and Meeson, B.: ISLSCP Initiative II global data sets: Surface boundary conditions and atmospheric forcings for land-atmosphere studies, *Journal of Geophysical Research: Atmospheres*, 111, D22S01, 2006.
- Iizumi, T., Yokozawa, M., Sakurai, G., Travasso, M. I., Romanenkov, V., Oettli, P., Newby, T., Ishigooka, Y., and Furuya, J.: Historical changes in global yields: major cereal and legume crops from 1982 to 2006, *Global Ecology and Biogeography*, 23, 346-357, 2014.
- Lawrence, D. and Slater, A.: Incorporating organic soil into a global climate model, *Clim Dyn*, 30, 145-160, 2008.
- Monfreda, C., Ramankutty, N., and Foley, J. A.: Farming the planet: 2. Geographic distribution of crop areas, yields, physiological types, and net primary production in the year 2000, *Global Biogeochemical Cycles*, 22, GB1022, 2008.
- Mueller, N. D., Gerber, J. S., Johnston, M., Ray, D. K., Ramankutty, N., and Foley, J. A.: Closing yield gaps through nutrient and water management, *Nature*, 490, 254-257, 2012.
- Oleson, K. W., Lawrence, D. M., Bonan, G. B., Drewniak, B., Huang, M., Koven, C. D., Levis, S., Li, F., Riley, W. J., Subin, Z. M., Swenson, S. C., Thornton, P. E., Bozbiyik, A., Fisher, R., Heald, C. L., Kluzek, E., Lamarque, J.-F., Lawrence, P. J., Leung, L. R., Lipscomb, W., Muszala, S., Ricciuto, D. M., Sacks, W., Sun, Y., Tang, J., and Yang, Z.-L.: Technical Description of version 4.5 of the Community Land Model (CLM), NCAR Earth System Laboratory Climate and Global Dynamics Division, Boulder, CO, USANCAR/TN-503+STR, 2013.
- Portmann, F. T., Siebert, S., and Döll, P.: MIRCA2000—Global monthly irrigated and rainfed crop areas around the year 2000: A new high-resolution data set for agricultural and hydrological modeling, *Global Biogeochemical Cycles*, 24, GB1011, 2010.
- Sacks, W. J., Deryng, D., Foley, J. A., and Ramankutty, N.: Crop planting dates: An analysis of global patterns, *Global Ecology and Biogeography*, 19, 607-620, 2010.
- Schaap, M. G. and Bouten, W.: Modeling water retention curves of sandy soils using neural networks, *Water Resources Research*, 32, 3033-3040, 1996.
- USDA and NRCS: Web Soil Survey. Soil Survey Staff. Natural Resources Conservation Service, United States Department of Agriculture., 2015.

Van Genuchten, M. T., Leij, F., and Lund, L.: Indirect methods for estimating the hydraulic properties of unsaturated soils. University of California, Riverside, 1992.

Waha, K., van Bussel, L. G. J., Müller, C., and Bondeau, A.: Climate-driven simulation of global crop sowing dates, *Global Ecology and Biogeography*, 21, 247-259, 2012.

Wei, Y., Liu, S., Huntzinger, D. N., Michalak, A. M., Viovy, N., Post, W. M., Schwalm, C. R., Schaefer, K., Jacobson, A. R., Lu, C., Tian, H., Ricciuto, D. M., Cook, R. B., Mao, J., and Shi, X.: The North American Carbon Program Multi-scale Synthesis and Terrestrial Model Intercomparison Project – Part 2: Environmental driver data, *Geosci. Model Dev.*, 7, 2875-2893, 2014.

Willmott, C., Ackleson, S., Davis, R., Feddema, J., Klink, K., Legates, D., O'Donnell, J., and Rowe, C.: Statistics for the evaluation and comparison of models, *J. Geophys. Res.*, 90, 8995-9005, 1985.

You, L., Wood, S., Wood-Sichra, U., and Wu, W.: Generating global crop distribution maps: From census to grid, *Agricultural Systems*, 127, 53-60, 2014.
